- 1 Title: Metabolic model of nitrogen-fixing obligate aerobe *Azotobacter vinelandii* demonstrates
- 2 adaptation to oxygen concentration and metal availability.
- 3 Running Title (54 Characters Max): Metabolic modeling predict dynamics of nitrogen fixation
- 4 Authors: Alexander B. Alleman, Florence Mus, John W. Peters#
- 5 Affiliation: Insitute of Biological Chemistry, Washington State University, Pullman, WA
- 6 Corresponding Author: John W. Peters, [jw.peters@wsu.edu](mailto:jw.peters@wsu.edu)
- 7

8 Abstract:

9           There is considerable interest in promoting biological nitrogen fixation as a mechanism to  
10 reduce the inputs of nitrogenous fertilizers in agriculture, a problem of agronomic, economic, and  
11 environmental importance. For the potential impact of biological nitrogen fixation in agriculture to be  
12 realized, there are considerable fundamental knowledge gaps that need to be addressed. Biological  
13 nitrogen fixation or the reduction of  $N_2$  to  $NH_3$  is catalyzed by nitrogenase which requires a large amount  
14 of energy in the form of ATP and low potential electrons. Nitrogen-fixing organisms that respire  
15 aerobically have an advantage in meeting the energy demands of biological nitrogen fixation but face  
16 challenges of protecting nitrogenase from inactivation in the presence of oxygen. Here, we have  
17 constructed a genome-scale metabolic model of the aerobic metabolism of nitrogen-fixing bacteria  
18 *Azotobacter vinelandii*, which uses a complex electron transport system, termed respiratory protection,  
19 to consume oxygen at a high rate keeping intracellular conditions microaerobic. Our model accurately  
20 determines growth rate under high oxygen and high substrate concentration conditions, demonstrating  
21 the large flux of energy directed to respiratory protection. While respiratory protection mechanisms  
22 compensate the energy balance in high oxygen conditions, it does not account for all substrate intake,  
23 leading to increased maintenance rates. We have also shown how *A. vinelandii* can adapt under  
24 different oxygen concentrations and metal availability by rearranging flux through the electron transport  
25 system. Accurately determining the energy balance in a genome-scale metabolic model is required for  
26 future engineering approaches.

27 Importance:

28 The world's dependence on industrially produced nitrogenous fertilizers has created a dichotomy of  
29 issues. Some parts of the globe lack access to fertilizers and associated poor crop yields, significantly  
30 limiting nutrition, contributing to disease and starvation. In contrast, in other parts of the world,  
31 abundant nitrogenous fertilizers and associated overuse result in compromised soil quality and  
32 downstream environmental issues. There is considerable interest in expanding the impacts of biological  
33 nitrogen fixation to promote improved crop yields in places struggling with access to industrial fertilizers  
34 and reducing fertilizers' inputs in areas where overuse is resulting in the degradation of soil health and  
35 other environmental problems. A more robust and fundamental understanding of biological nitrogen  
36 fixation's biochemistry and microbial physiology will enable strategies to promote new and more robust  
37 associations between nitrogen-fixing microorganisms and crop plants.

38 Introduction

39 The availability of fixed nitrogen is of paramount importance to prototrophs, like plants. In  
40 agriculture, nitrogen fertilizers have become essential to maximizing crop yields to support the growing  
41 world population (1). Biological nitrogen fixation (BNF) is the reduction of atmospheric dinitrogen (N<sub>2</sub>) to  
42 ammonia (NH<sub>3</sub>) by diazotrophic bacteria and archaea, which accounts for ~60% of the fixed nitrogen  
43 input into natural ecosystems (2). Nitrogenase, the enzyme catalyzing N<sub>2</sub> reduction, is a significant  
44 energy sink as it requires large amounts of ATP and low potential electrons to produce NH<sub>3</sub>. There are  
45 three types of nitrogenase, termed Mo-, V-, and Fe-only nitrogenases, reflecting the metal cofactors'  
46 composition in N<sub>2</sub> reduction catalysis (3–5). Bacteria that contain V- and Fe-only nitrogenase are not  
47 dependent on Mo availability in the environment (6). Despite the similar features shared by the three  
48 nitrogenases, they differ in their reaction stoichiometry (7, 8). Whereby Mo-nitrogenase is the most  
49 efficient, requiring a minimum of 8 low potential electrons and 16 MgATP to convert N<sub>2</sub> to 2 NH<sub>3</sub> (**eq 1**)  
50 *in vitro*, and V- and Fe-only nitrogenases have lower catalytic activities and different reaction  
51 stoichiometries, requiring more electrons and ATP for catalysis and producing more H<sub>2</sub> relative to NH<sub>3</sub>.

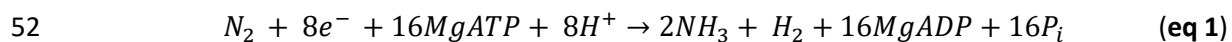

53 Diazotrophs, are physiologically diverse, including obligate aerobes, facultative anaerobes,  
54 anaerobic heterotrophs, anoxygenic or oxygenic phototrophs, and chemolithotrophs (9, 10). Under  
55 nitrogen-fixing conditions, diazotrophs must remodel their energy metabolism to provide nitrogenase  
56 with ATP and low potential electrons while protecting the enzyme from irreversible inactivation by  
57 oxygen (11). Oxygen protection is not an issue for strict anaerobes; however, the energy demands of  
58 nitrogen fixation during anaerobic metabolisms, such as fermentation, are profound relative to energy  
59 production per unit carbon (9). In contrast, oxygen respiration and photosynthesis can generate more  
60 energy for diazotrophic growth but protecting nitrogenase from oxygen inactivation becomes

61 paramount. Diazotrophs that live in the air deal with protecting nitrogenase from inactivation through  
62 various mechanisms that involve conditionally, temporally, or spatially separating oxidative  
63 phosphorylation or photosynthesis from nitrogen fixation (12).

64 The ubiquitous soil bacterium *Azotobacter vinelandii* is arguably the most robust and productive  
65 nitrogen-fixing organism known (13, 14). *A. vinelandii* possesses a greater capacity to fix nitrogen than  
66 many other diazotrophs because of its ability to fix nitrogen under high oxygen concentrations. This  
67 ability is dependent on multiple mechanisms to protect nitrogenase from inactivation by oxygen (11,  
68 15–17). One of the primary mechanisms involves harnessing a robust and dynamic respiratory  
69 metabolism to balance the high energy demands of nitrogen fixation while simultaneously consuming a  
70 high amount of oxygen at the membrane. This process, termed respiratory protection, maintains high  
71 enough respiration rates to sustain low oxygen tensions in the cytoplasm (11). A branch of the electron  
72 transport chain increases oxygen consumption by partially decoupling ATP synthesis from O<sub>2</sub>  
73 consumption (14, 19). To supply energy for respiratory protection, *A. vinelandii* catabolizes sugars  
74 through the Entner-Doudoroff and pentose phosphate pathways to produce acetyl-CoA, then  
75 predominately uses the TCA cycle to deliver NADH (20, 21). During diazotrophic growth, *A. vinelandii*  
76 must efficiently balance the reduction of low potential electron carriers, ATP production using oxidative  
77 phosphorylation, and protection of the nitrogenase enzyme from oxygen through its dynamic electron  
78 transport system (ETS) (Fig 1).

79 *A. vinelandii* adjusts respiration through a branched respiratory chain that includes multiple  
80 dehydrogenases and terminal oxidases. The chain's two branches are classified as 1) the proton-coupled  
81 branch and 2) the partially-coupled respiratory protection branch (15) (Fig. 2). These are mediated by  
82 two distinct NADH:quinone redox reaction complexes (NDH). The first, NDHI, is coupled to the  
83 transmembrane proton potential and is mechanistically similar to complex I of mitochondria (22).  
84 However, the second, NDHII, is induced at high aeration conditions and carries out NADH oxidation

85 without translocating protons across the membrane, thus decoupling oxygen consumption from ATP  
86 generation (19). Other dehydrogenases (DH) can also donate to the quinone pool, including malate DH,  
87 succinate DH, and hydrogenases. The first two of these DHs do not increase in expression under  
88 nitrogen-fixing conditions. However, uptake hydrogenases are known to recycle electrons from the H<sub>2</sub>  
89 produced by nitrogenase into the quinone pool (23, 24).

90 The oxidative side of the respiratory chain in *A. vinelandii* branches into several oxidases,  
91 including the *bc1*-complex, cytochrome *c4/c5*, and *o*-type or *cbb*<sub>3</sub> terminal oxidases within the proton-  
92 coupled branch and cytochrome *bd*-type terminal oxidase within the partially-coupled respiratory  
93 protection branch (Fig. 2). Cytochrome *bd* accumulates under high aeration conditions, and knockout  
94 mutants lacking *bd* oxidase cannot grow diazotrophically at any aeration rate (13, 14, 25). The proton-  
95 coupled respiratory branch terminates in a classical cytochrome *bc1* reduction of cytochrome *c* to a  
96 terminal oxidase of cytochrome-*o* or *cbb*<sub>3</sub> (26). This branch has not been as well-characterized in *A.*  
97 *vinelandii*. Still, kinetic evidence *in vivo* supports the existence of two cytochrome-*c* terminal oxidases  
98 (13).

99 Under nitrogen-fixing conditions, *A. vinelandii* directs most electrons to the reduction of NAD<sup>+</sup>,  
100 which has a reduction midpoint potential of ~-320mV, while nitrogenase requires electrons with a lower  
101 potential of ~-500mV (27). Additional energy is required to transfer electrons from NADH to lower  
102 potential electron carriers, such as ferredoxin (Fd) or flavodoxin (Fld). Under nitrogen-fixing conditions,  
103 *A. vinelandii* expresses membrane-associated Fix and Rnf complexes that catalyze the endergonic  
104 reduction of Fd/Fld by NADH (28, 29). Rnf uses the proton motive force to provide the additional energy  
105 required in the reaction (30–32). The Fix complex use flavin-based electron bifurcation in which Fix  
106 catalyzes the coordinated transfer of electrons from NADH to Coenzyme Q (CoQ) and Fd/Fld (29). The  
107 combination of branched electron transport to oxygen and the generation of Fd/Fld creates the ETS (Fig  
108 2).

109           The metabolic energy cost of nitrogen fixation in *A. vinelandii* has recently been studied through  
110 carbon-based metabolomics (20) and investigated through multiple quantitative and metabolic models  
111 (33–35). However, these studies have not accounted for the dynamic *A. vinelandii*'s ETS and energy  
112 requirements, thus lack either insights into enzyme pathways of energy homeostasis or fail to predict  
113 growth under high oxygen and high substrate conditions. By integrating *A. vinelandii*'s energy  
114 metabolism dynamics under nitrogen-fixing conditions into the genome-scale metabolic model, an  
115 accurate growth and partitioning of resources can be predicted. Interestingly within the model, the  
116 carbon cost of aerobic nitrogen fixation is not entirely accounted for by the energy decoupling of the  
117 ETS's partially-coupled respiratory protection branch. We show that under laboratory conditions of high  
118 carbon and high oxygen concentrations, large amounts of energy are dedicated to maintaining  
119 respiratory protection even in the presence of fixed nitrogen in the growth medium. Understanding the  
120 distribution of flux throughout the ETS is essential in the development of ammonia-excreting  
121 diazotrophs. The energy requirements and the metabolic bottlenecks for newly engineered ammonia-  
122 excreting strains may be predicted with the model.

123           The future of agriculture is dependent on an affordable, renewable, and environmentally sound  
124 supply of nitrogenous fertilizer. Synthetic biology and BNF have the potential of alleviating some  
125 dependency on traditional fertilizing techniques. Nevertheless, to maximize high throughput synthetic  
126 biology abilities, an accurate understanding of nitrogen fixation on the systems level is required. The  
127 metabolic model presented here is the first step in understanding some of the dynamics of this complex  
128 system.

## 129 **Results**

130 ***Curation of the metabolic model of A. vinelandii***- Recently, a metabolic model (*iDT1278*) has been  
131 published that encompasses much of the *A. vinelandii* genome, establishing carbon and nitrogen sources

132 using Biolog plate experiments (35). This model provides a framework for understanding the metabolism  
133 of *A. vinelandii* and is a valuable model for understanding the production of biopolymers. The model  
134 *iDT1278* lacked essential enzymes required for nitrogen fixation and failed to determine an accurate  
135 growth rate in standard laboratory conditions of complete aeration and at least 10g/L of sucrose or  
136 equivalent carbon (36). A new model (*iAA1300*) presented here builds off the model *iDT1278* by adding  
137 missing reactions and manually curating inadequately annotated constraints (Table S1). Key enzymes of  
138 the ETS were added to *iAA1300*, including Fix, NDHI, a quinone:cytochrome c oxidoreductase, V- and Fe-  
139 only nitrogenase, and a transhydrogenase, all of which have been biochemically or genetically  
140 determined to play a role during nitrogen fixation.

141 After manual curation, the model required central carbon metabolism constraints to represent  
142 experimental results more accurately. First, unlike other pseudomonads, *A. vinelandii* contains  
143 phosphofructose kinase (PFK) and has a complete Embert-Meyerhoff pathway (37). Nevertheless,  
144 multiple studies have shown that *A. vinelandii* utilizes the Entner-Doudoroff pathway (ED) (20, 38). Flux  
145 into the ED pathway and the glyoxylate shunt was constrained to a ratio determined previously by <sup>13</sup>C-  
146 metabolic flux analysis (20). While these constraints directed carbon into the correct pathways, the  
147 predicted growth rate for model *iAA1300* was still inaccurate (Table 1).

148 ***Establishing parameters for accurate growth rate determination-*** Model *iAA1300* overestimated  
149 growth in almost every condition due to the lack of accurate non-growth associated maintenance flux  
150 (NGAM). Microbiologists since the '50s have observed that the genus *Azotobacter* has an unusually high  
151 respiration rate leading to increased maintenance requirements (34–37). The high maintenance and  
152 respiration rate of *A. vinelandii* results in low biomass yields compared to other model proteobacteria.  
153 Quantitative modeling accurately described this phenomenon with high amounts of energy diverted to  
154 respiratory protection (33).

155 To translate the excess energy consumption into the genome-scale model, experimental data  
156 was used to predict an ATP maintenance (ATPM) rate under different O<sub>2</sub> concentrations. Khula and  
157 Oelze (43) measured maintenance coefficients ( $\text{mmol}_{\text{Substrate}} \cdot \text{hr}^{-1} \cdot \text{g of protein}^{-1}$ ) of *A. vinelandii* growing  
158 in continuous diazotrophic cultures in different O<sub>2</sub> concentrations and carbon sources using the Prit  
159 method (44) (Table 2). Maintenance coefficients increased as the O<sub>2</sub> concentration increased in the  
160 bioreactor. Converting the experimentally determined maintenance coefficient to the genome-scale  
161 model ATPM ( $\text{mmol}_{\text{ATP}} \cdot \text{hr}^{-1} \cdot \text{g CDW}^{-1}$ ) requires an ATP/substrate ratio term. An issue arises with  
162 converting the maintenance coefficient to ATPM when considering the ATP produced per O<sub>2</sub> consumed  
163 (P/O) ratio of the different branches of the ETS. The proton-coupled branch uses a mol of glucose to  
164 produce 32 mols of ATP, but the partially-coupled respiratory protection branch only produces 9 mols of  
165 ATP per mol of glucose. During high substrate and high O<sub>2</sub> conditions, *A. vinelandii* requires decoupling  
166 of the ETS through the respiratory protection branch to maintain growth and minimize maintenance  
167 requirements (25, 45, 46).

168 To confirm the use of the partially-coupled respiratory protection branch, each path of the ETS  
169 network was tested to determine its accuracy to predict the growth rate. Two models were created, the  
170 first assuming all flux to O<sub>2</sub> is directed through NDHI and cytochrome *co* (fully-coupled branch) and the  
171 second all flux to O<sub>2</sub> through NDHII and cytochrome *bd* (respiratory protection branch) (Fig 2). In both  
172 models, substrate uptake rates were set to the experimentally determined maintenance coefficients for  
173 each O<sub>2</sub> concentration (43). This uptake rate represents the substrate consumption when no growth  
174 occurs; therefore, all energy produced must go to NGAM. To determine the corresponding NGAM for  
175 each condition, flux through the reaction ATPM was increased until the growth rate reached zero (Table  
176 2).

177 The model determined maintenance rates were then tested to predict growth rates at the  
178 different O<sub>2</sub> concentrations. Each model was given the experimental substrate uptake rate and the



179 predicted ATPM flux for each O<sub>2</sub> concentration. Growth rates were then predicted and tested for error  
180 against experimental growth rates. Using the fully-coupled branch results in growth overestimates for all  
181 O<sub>2</sub> concentrations (Fig. 3b). The respiratory protection branch model predicted growth rates with a  
182 minor error, especially for the lower O<sub>2</sub> concentrations (Fig. 3a). The model is within reasonable error  
183 across all growth rates for O<sub>2</sub> concentrations of 12, 48, and 108 μM (Table S2). For the higher O<sub>2</sub>  
184 concentration of 144 and 192 μM, the respiratory protection branch model still overestimates growth.  
185 Showing a high O<sub>2</sub> concentration respiratory protection and predicted maintenance could not  
186 compensate for total energy expenditure, requiring more ATPM flux than predicted.

187 ***Assessment of growth yield in response to oxygen concentration-*** With detailed maintenance  
188 estimates, overall growth efficiencies can be further investigated. The growth yield was predicted using  
189 experimental sucrose uptake and plotted along with the experimentally determined growth yield (Fig.  
190 4a). Similar to the growth rate predictions, the growth yield predictions indicate that the 12, 48, and 108  
191 μM of O<sub>2</sub> conditions are within error. In comparison, 144 and 192 μM of O<sub>2</sub> are more challenging to  
192 predict with overestimating growth yields. The differentiation of growth yield between the 12 μM  
193 condition and higher O<sub>2</sub> conditions initially seen in the experimental data can be reproduced with the  
194 model. The original paper of Kuhla and Oelze discussed this effect as the “decoupling of respiration” or  
195 respiratory protection (43). However, we have shown that the partially coupled respiratory protection  
196 branch is still required even at 12 μM of O<sub>2</sub>. To investigate this phenomenon more acutely, energy  
197 allocation during the increase of O<sub>2</sub> concentration was plotted (Fig 3b). Both the flux to ATP synthase  
198 and O<sub>2</sub> respiration (cytochrome *bd*) increase linearly with O<sub>2</sub> concentration. However, partitioning of the  
199 ATP differentiates the 12 μM condition from the high O<sub>2</sub> concentrations. The percentage of ATP  
200 consumed in ATPM reaction plateaus to around 60% of total ATP consumed for 48, 108, 144, and 192  
201 μM of O<sub>2</sub> while only at ~ 30% for 12 μM of O<sub>2</sub>. This differentiation allows for more ATP to be utilized in  
202 biomass production, creating higher growth yields for the 12 μM of O<sub>2</sub> concentration.

203 ***Ammonia-assimilating conditions require high maintenance for accurate growth.*** The respiratory  
204 protection mechanism was considered a mechanism directly responsible for protecting nitrogenase  
205 from O<sub>2</sub> damage (11). Experimentally, ammonia-supplemented conditions are similar to growth in  
206 diazotrophic conditions under high carbon, with comparable growth rates and biomass yield (20, 41).  
207 Modeling ammonia-supplemented growth shows the requirement of the partially coupled respiratory  
208 branch to minimize ATPM and accurately predict growth (Table 1). While there is a lack of accurate  
209 physiological details on *A. vinelandii* grown in high carbon and ammonia-supplemented media, similar  
210 respiration rates have been reported (41). The energy allocation under ammonia-supplemented growth  
211 shows that the ATP saved from nitrogen fixation is used for biomass production (Fig. S1).

212 ***Effects of enzymes Rnf and Fix on accurate growth predictions.*** While the model shows the  
213 requirement of the respiratory protection branch to minimize flux through NGAM, little is known about  
214 Rnf and Fix's roles during different O<sub>2</sub> conditions. When determining ATPM flux, both branches of Rnf  
215 and Fix were considered, but either path did not affect the overall cost of NGAM. Under high O<sub>2</sub>  
216 conditions, the percent of electron flux required for ferredoxin production is minimal compared to  
217 respiration. However, the different reaction mechanisms suggest these enzymes might play different  
218 roles within the ETS. This difference is accentuated when the uncoupled NADH dehydrogenase (NDHII) is  
219 used, and the energetic cost of Fix is not penalized. As the flux increases to nitrogenase and away from  
220 O<sub>2</sub> reduction, Fix is favored as it can maintain a higher ATP production rate (Fig S2). Rnf can lower  
221 growth yields and increase O<sub>2</sub> consumption, which could help predict high O<sub>2</sub> concentrations more  
222 accurately.

223 ***Flux sampling analysis reveals the dynamics of the ETS.*** A flux sampling approach was taken to further  
224 understand the network's variability under high and low O<sub>2</sub> conditions. While similar in concept to flux  
225 variability analysis, flux sampling analysis provides a range of all feasible solutions and allows for a  
226 distribution of the feasible fluxes, permitting statistics in determining shifts of change between

227 conditions (47). To assess the effect of increased O<sub>2</sub> during nitrogen fixation, the maintenance  
228 constraints defined in Table 2 under 108 and 12 μM of O<sub>2</sub> were used. Flux balance analysis (FBA) showed  
229 similar growth rates of 0.202 hr<sup>-1</sup> for 108 and 0.222 hr<sup>-1</sup> for 12 μM of O<sub>2</sub> making flux comparison  
230 approachable under these constraints. Samples were taken and normalized to sucrose uptake rate to  
231 compare electron allocation in the model. NADH production in the TCA increased in 108 μM of O<sub>2</sub>  
232 compared to 12 μM of O<sub>2</sub>, but NADH consuming reactions such as glutamate synthase decreases flux in  
233 higher O<sub>2</sub> concentrations, relative to carbon uptake (Fig 4a). The respiratory protection of the uncoupled  
234 NADH dehydrogenase and terminal oxidase cytochrome *bd* increases flux under higher O<sub>2</sub>  
235 concentrations to protect nitrogenase and supply ATP for the increased maintenance rate. Electron  
236 transfer to nitrogenase through ferredoxin-reducing enzymes Rnf and Fix is reduced in higher O<sub>2</sub>  
237 concentrations while ATP synthase is increased overall, leading to less flux to nitrogenase (Fig 4b).

238 ***Efficient growth under metal limited conditions-*** *A. vinelandii* can adapt to the metal availability of its  
239 environment by using alternative nitrogenases. While the alternative nitrogenases use more common  
240 metals such as V and Fe, they are less efficient at reducing nitrogen than Mo-nitrogenase (eq 2, 3) (3).  
241 This inefficiency of ammonia production acts as an unnecessary sink for electrons, reducing the growth  
242 rate of *A. vinelandii* in Mo-limited conditions. Interestingly, while the cost to fix nitrogen rises 30% for V-  
243 nitrogenase and 60% for Fe-only nitrogenase, growth rates do not show an equal decrease (4, 48).  
244 Indicating a rearrangement of flux to compensate for the energy and electrons sink of the alternative  
245 nitrogenase while also maintaining O<sub>2</sub> protection.

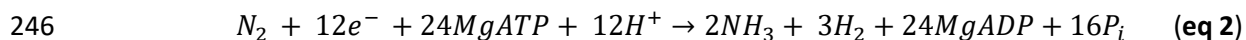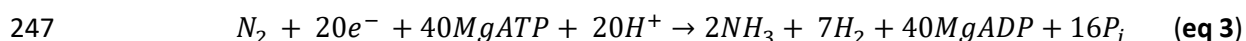

248 To demonstrate growth under alternative nitrogenase conditions, the flux through Mo-  
249 nitrogenase or both Mo- and V-nitrogenase was set to zero for V and Fe-only conditions, respectively.

250 Growth rates were determined with FBA as well as O<sub>2</sub> uptake rates and flux through each nitrogenase  
251 (Table 3). The model shows a slowing of growth by 13% for V-conditions and 31% for Fe-only conditions,  
252 which follows but is not proportional to the increased cost of nitrogenase turnover. Additionally, only a  
253 small increase of flux to O<sub>2</sub> consumption is required to maintain energy production in alternative  
254 conditions.

255 To further investigate the rearrangement of the *A. vinelandii* metabolism to compensate for  
256 alternative nitrogenase flux, the flux sampling method was used to determine probabilities for flux  
257 changes between conditions. Flux samples were plot relative to the Mo-nitrogenase flux to better  
258 determine the alternative nitrogenases' positive or negative effect (Fig S3). From the flux sampling, an  
259 increase in flux is seen through Fix as the alternative nitrogenases become less efficient, requiring more  
260 Fd. This effect is also true for uptake hydrogenase, which adapts to the increased hydrogen byproduct.  
261 The flux through the uncoupled NADH dehydrogenase is decreased as electron flux is compensated by  
262 hydrogenase and Fix (Fig S3).

263 ***Optimal ammonia excretion under aerobic nitrogen-fixing conditions***- Unlocking *A. vinelandii*'s  
264 nitrogen fixation regulatory system by deletion of *nifL* gene allows nitrogenase to be constitutively  
265 expressed even in the presence of high ammonia concentration in the media (36, 49). The ability to  
266 engineer an ammonia-excreting strain has been a target for genetic engineering for many decades. By  
267 simulating *A. vinelandii* to produce the maximum ammonia in agricultural or industrial scenarios, key  
268 insights can be developed for future engineering targets. To test the viability of ammonia excretion of  
269 the model and the effect of O<sub>2</sub> maintenance, models of low and high O<sub>2</sub> (12 and 108 μM of O<sub>2</sub>) were set  
270 to excrete ammonia at a rate of 3 mmol<sub>Ammonia</sub> · hr<sup>-1</sup> · g CDW<sup>-1</sup> as estimated from Plunkett *et al.* (36). The  
271 increase of ammonia excretion essentially doubles the flux through nitrogenase and reduces the growth  
272 rate, respectively (Table 4). Ammonia-excreting strains start to excrete ammonia within the stationary  
273 phase during batch growths (36). In these conditions, cell growth would be minimal, and O<sub>2</sub> would be

274 limited due to cell density. As maximal ammonia excretion starts in the early stationary phase, the  
275 growth rate might not represent what is happening in the batch culture. Ammonia yields for high and  
276 low O<sub>2</sub> are similar with 1.3 (mol<sub>sucrose</sub>/mol<sub>ammonia</sub>) predicted and while ~1.4 (mol<sub>sucrose</sub>/mol<sub>ammonia</sub>) was  
277 experimentally determined. When O<sub>2</sub> was increased to reduce the amount of time required for  
278 ammonia accumulation, an ammonia yield of ~2.3 (mol<sub>sucrose</sub>/mol<sub>ammonia</sub>) was experimentally  
279 determined, and 3 (mol<sub>sucrose</sub>/mol<sub>ammonia</sub>) was predicted (36).

## 280 Discussion

281 The energy dynamics of aerobic metabolism and nitrogen fixation have been under discussion for many  
282 decades. The mechanism of respiratory protection first developed in *A. vinelandii* has been at the center  
283 of this discussion as this strategy has also been proposed for other aerobic nitrogen fixers such as  
284 oxygenic phototrophic cyanobacteria (50–52). Here we have presented a genome-scale metabolic model  
285 correctly estimating the effects of O<sub>2</sub> on nitrogen fixation. The model has shown surprising results that  
286 contribute to more significant questions about aerobic metabolism during nitrogen fixation.

287         The decoupling of energy consumption and biomass accumulation combined with an  
288 exceptionally high respiration rate led to the proposal of respiratory protection (40, 53). This proposal  
289 was reinforced with the discovery of a branch of the ETS within *A. vinelandii* containing an uncoupled  
290 NADH dehydrogenase and cytochrome *bd* terminal oxidase with high V<sub>max</sub> and low affinity for O<sub>2</sub> (11,  
291 22, 25, 45, 54). Others have disagreed with the basic principles of respiratory protection as nitrogen  
292 fixation and O<sub>2</sub> consumption are not correlated (15). Respiration rate plateaus after a concentration of  
293 70 μM of O<sub>2</sub> with only a corresponding slight decrease of nitrogenase rate (41). While these  
294 observations of plateauing of O<sub>2</sub> respiration are valid, the decoupling of energy from biomass still  
295 increases with O<sub>2</sub> concentration. Inomura et al. develop a quantitative mechanistic model showing  
296 increased respiratory protection, including maintenance as the O<sub>2</sub> concentration increases (33). While

297 the Inomura model accurately described respiratory protection and maintenance, an energy transfer  
298 efficiency parameter estimates the efficiency of the ETS to convert carbon into ATP. Using a  
299 stoichiometric model, we have provided evidence missing in other models and theories about  
300 respiratory protection.

301       Using experimental maintenance coefficients and the genome-scale model *iAA1300*, we have  
302 shown that the partially-coupled respiratory protection branch is required for all measured O<sub>2</sub>  
303 concentrations. The partially coupled branch's requirement is based on the assumption of minimizing  
304 NGAM within the model, which is high compared to other proteobacteria genome-scale models (55, 56).  
305 Minimization of NGAM is dependent on the decoupling of the ETS and the respiratory protection  
306 branch, but transcript expression and spectrographic data suggest that the fully-coupled branch may be  
307 active during normal nitrogen-fixing conditions (13, 23, 49, 57). More significant energy dissipation  
308 through the NGAM mechanism would be required if flux passes through both partially-coupled  
309 respiratory protection and fully-coupled branch.

310       O<sub>2</sub> reduction and energy production decoupling are not entirely accounted for by the partially-  
311 coupled respiratory protection branch alone. The extra energy consumption required to maintain  
312 accurate growth is modeled as an ATP consumption reaction. This consumption is most likely many  
313 different reactions and does not have to be ATP, but two categories can be proposed 1) base metabolic  
314 reactions not accounted for in the model 2) reactions that respond to O<sub>2</sub> and dissipate energy. For the  
315 first category, more accurate physiological data and biomass composition would help predict energetic  
316 needs. The current model predicts growth yields for 12, 44, 108 μM O<sub>2</sub> concentrations, so a significant  
317 change in the biomass equation is not expected (Fig 4a). The *A. vinelandii* strain OP and derivatives such  
318 as strain DJ cannot produce alginate and do not produce Poly(3-hydroxybutyrate) under high O<sub>2</sub> and  
319 continuous culture (58–61). However, energy-consuming mechanisms like protein turnover and  
320 unknown transport of metabolites or proteins might contribute to the basal NGAM. The second

321 category of reactions responds to the O<sub>2</sub> concentration and could be responsible for the energy  
322 dissipation. First, protein turnover and reactive O<sub>2</sub> species in high O<sub>2</sub> concentrations are unknown.  
323 Characterization of O<sub>2</sub> sensitive *A. vinelandii* mutants showed only three of thirteen had decreased  
324 respiration or catalase rate, leaving mechanisms other than respiratory protection as possibly  
325 responsible for O<sub>2</sub> sensitivity (62). Also, reactions known to be active during nitrogen fixation are  
326 challenging to model in steady-state such as proton leak, pili formation, and the *in vivo* stoichiometry of  
327 nitrogenase (23, 63, 64). Additionally, other reactions can consume O<sub>2</sub> with a low enough reduction  
328 potential, including Mehler reactions or soluble terminal oxidases (65, 66).

329         Preserving high NGAM and the respiratory protection branch is also required for growth under  
330 ammonia supplemented conditions. While accurate data with high carbon and high ammonia is lacking,  
331 the diazotrophic maintenance rate predicted accurate growth rates for the ammonia supplement  
332 model. Under high sucrose and O<sub>2</sub> concentrations, ammonia supplemented and nitrogen-fixing *A.*  
333 *vinelandii* respire at similar rates and offer similar steady-state protein levels (41), leading to the  
334 proposal that respiratory protection is not a mechanism for nitrogenase protection but a response to  
335 high carbon and O<sub>2</sub> concentrations. The respiratory protection branch is regulated by *cydR*, an FNR  
336 regulatory protein that responds directly to O<sub>2</sub> (25). The terminal oxidase cytochrome *bd* is not required  
337 for ammonia-supplemented growth (45). However, cytochrome-*d* deficient mutants grow poorly in  
338 ammonia-supplemented media if not inoculated at high cell density (45, 57). The decoupling of energy  
339 and high NGAM in ammonia supplemented growth could be maintained to keep the cytosol in low O<sub>2</sub> or  
340 low redox potential for either reaction not related to nitrogenase or in preparation for nitrogenase  
341 expression.

342         To adapt to higher O<sub>2</sub> concentrations, *A. vinelandii* must increase electron production. Flux  
343 sampling normalized to sucrose uptake shows an increased flux of energy-producing reaction of the TCA  
344 cycle and a decreased flux in other reactions such as glutamate synthase, Fix, Rnf, and nitrogenase. As

345 the flux to O<sub>2</sub> reduction and ATP generation increases, the percent of energy allocated to nitrogen-fixing  
346 reactions decreases. This explains why mutations in what should be necessary enzymes such as Fix or  
347 Rnf and uptake hydrogenase do not affect growth under standard high O<sub>2</sub> conditions (24, 29, 67).  
348 Nevertheless, if more energy is allocated to nitrogenase under low O<sub>2</sub> or Mo-limited conditions, these  
349 reactions become more critical. The increasing energy demand is significant during Mo-limited  
350 conditions, requiring 30% and 60% more energy for V-nitrogenase and Fe-only nitrogenase, respectively.  
351 Interestingly, *A. vinelandii* only grows slightly slower in media lacking Mo or lacking both Mo + V, under  
352 batch and continuous culture (48). The increased flux through hydrogenase and energy-conserving  
353 reactions like Fix allows *A. vinelandii* to maintain a higher growth rate. This general pattern shows when  
354 comparing Rnf's energy-consuming proton motive force mechanism versus Fix's energy-conserving  
355 electron bifurcation mechanism. As the cell moves away from the energy decoupling reaction, Fix can  
356 sustain growth. While kinetics and thermodynamics also influence the enzymes of the ETS, the  
357 stoichiometric pattern shows distinct roles for these enzymes.

358 Biological nitrogen fixation can alleviate the cost and damage caused by industrial nitrogenous  
359 fertilizer. Ammonia-excreting strain of *A. vinelandii* has supported plant growth and is a candidate for  
360 biofertilizer (68–70). Understanding the dynamics of metabolism under ammonia-excreting conditions  
361 will be essential to engineering more robust strains. Recent work optimized ammonia-excreting strains  
362 and showed up to 3 mmol of mmol<sub>Ammonia</sub> · hr<sup>-1</sup> · g CDW<sup>-1</sup> excreted into the media (36). Modeling these  
363 rates shows a doubling of flux through nitrogenase and a halving of growth rate. Interestingly, ammonia-  
364 excreting strains grow at similar rates compared to WT, but the accumulation of ammonia in the media  
365 occurs in the stationary phase during batch culture. Suggesting that within WT nitrogenase flux limits  
366 growth in the log phase and is regulated in the stationary phase once carbon is low. In contrast,  
367 ammonia-excreting strains are also nitrogenase limited in the log phase but cannot regulate nitrogenase



368 in the stationary phase. More dynamic modeling of this phenomenon will allow for more optimization  
369 and balance, leading to a technology that will maximize ammonia yield.

### 370 **Conclusion-**

371 We have been able to establish a genome-scale metabolic model of nitrogen fixation and  
372 adaptations to O<sub>2</sub>. This model gives a blueprint for future engineering strategies in nitrogen fixation and  
373 its ability to help offset nitrogenous fertilizer. We have shown that the nitrogen fixation model is  
374 affected by carbon concentration, O<sub>2</sub> concentration, and ammonia supplementation. By adding the ETS  
375 to this model, we have discovered that the regulation of respiratory protection, which previously was  
376 proposed to be a mechanism for diazotrophic conditions, might be a general response to high carbon  
377 and high O<sub>2</sub> conditions. The allocation of resources to an extraordinarily high maintenance rate is  
378 compensated by lowering growth yields and the rearrangement of the ETS. Future engineering in  
379 ammonia-excreting organisms must consider this balance between O<sub>2</sub> reduction and nitrogen fixation  
380 and the complex relationship between the two.

### 381 **Materials and Methods-**

382 **Model curation-** To build on top of the previous model, *iDT1278* (35), essential reactions for  
383 diazotrophic growth were corrected for stoichiometry and annotation or added to the model (Table S1).  
384 Enzymes of the ETS were added, including the electron bifurcating Fix complex, fully coupled NADH  
385 dehydrogenase I complex, cytochrome c oxidoreductase, nitrogenase homologs V-nitrogenase and Fe-  
386 only nitrogenase, as well as a soluble hydrogenase and a transhydrogenase. Other reactions were either  
387 reannotated or removed. All reactions using menaquinone were removed as *A. vinelandii* only contains  
388 quinone (71–73). Glucose uptake was constrained to reaction GLCt2pp (*gluP*) (74). The Rnf reaction  
389 stoichiometry was changed from 3 protons translocated to 6 protons translocated based on  
390 thermodynamic and kinetic analysis and found at the connected GitHub page in the RNF\_stoich.ipynb

391 jupyter notebook. The ED pathway and the glyoxylate shunt were constrained to ratios determined by  
392 metabolic flux analysis (20) using a custom python function based on COBRA MatLab function  
393 addRatioReaction (75).

394 The model was cleaned from dead-end reactions and orphaned metabolites while maintaining  
395 genome-relevant reactions. Out of the 2,289 reactions, 278 were essential, while 928 were categorized  
396 as blocked reactions where they could not carry flux. To allow the model to be built upon in the future,  
397 reactions with a corresponding gene are kept even if the reactions are blocked. Of the blocked  
398 reactions, 177 had no associated genes and were removed as they are not involved in gap-filling or gene  
399 homology. Following the removal of blocked “geneless” reactions, an additional 45 metabolites were  
400 also removed.

401 To determine the consistency and annotation standards within model *iAA1300*, memote  
402 software has been used with summary statistics reported in Table S3 and fully reports on the GitHub  
403 page (76).

404 **Flux balance analysis**- All calculations were done with the cobrapy 0.21.0 (77). For flux balance analysis,  
405 the optimization problem is formulated as:

406 
$$\max Z$$

407 *given:*

408 
$$\begin{cases} S \cdot v = 0 \\ b_i \leq v_i \leq c_i \\ Z = \sum_k n_k v_k \end{cases} \forall v_i \in v$$

409 With Z being the biomass equation, with the stoichiometric coefficients  $n_k$  and the biomass flux as  $v_k$ .

410 Biomass coefficients have a unit of  $\text{hr}^{-1}$  and represent the specific growth rate.  $S$  represents the

411 stoichiometry matrix, and  $v$  is the flux vector. The scalars  $b_i$  and  $c_i$  are the lower and upper bounds for  
412 each flux  $v_i$ .

413 **Maintenance rate quantification**- Maintenance coefficients were taken from Table 1 in Kuhla and Oelze  
414 (43) and used as the sucrose uptake rate for the model. Under these conditions, the assumption is that  
415 all energy is going to NGAM, causing a zero growth rate. To determine the value of NGAM, the ATPM  
416 rate lower bound was increased until the growth reached zero, allowing all sucrose consumption to be  
417 allocated to NGAM. The determination of ATPM using this method depends on the ETS efficiency, so the  
418 fully-coupled branch and the respiratory protection branch of the ETS were used to determine a  
419 separated ATPM. Each ETS branch was then tested under different O<sub>2</sub> concentrations giving a specific  
420 ATPM rate for experimentally determined maintenance coefficient (Table 2).

421 Testing the ATPM/NGAM values was done by setting the ATPM within the model and then  
422 increasing the sucrose uptake rate to the experimentally derived value found in Figure 4 of Kuhla and  
423 Oelze (43). Figure data points were taken using WebPlotDigitizer version 4.3 (78). With experimentally  
424 determined sucrose uptake rate and theoretically determined ATPM rates, a growth rate was predicted.  
425 The predicted growth rates were plotted against the known growth rates for both the fully-coupled and  
426 respiratory protection branches of the ETC. Determining mean standard error (MSE), mean absolute  
427 error (MAE), and root mean squared error (RSME) were all measured using the package `scipy.stats` (79).

428 **Flux sampling**- Flux sampling analysis was conducted in COBRApy (77) using the `optGpSampler` (80)  
429 algorithm using 100000 samples with a thinning rate of 10000 in accordance with Hermann et al. (47).  
430 Model constraints for flux sampling were used from previous analysis for 108  $\mu\text{M}$  and 12  $\mu\text{M}$  O<sub>2</sub> with the  
431 experimentally derived sucrose uptake rate of 9 and 4 mmol of sucrose  $\text{hr}^{-1}$   $\text{gCDW}^{-1}$ , respectively. The  
432 maintenance rates were used from the previous analysis of 110 mmol of ATP  $\text{hr}^{-1}$   $\text{gCDW}^{-1}$  for 108  $\mu\text{M}$  O<sub>2</sub>  
433 and 16 mmol of ATP  $\text{hr}^{-1}$   $\text{gCDW}^{-1}$  for 12  $\mu\text{M}$  O<sub>2</sub>. Traditional FBA analysis was also performed to compare

434 sampling analysis showing a growth rate of  $0.202 \text{ hr}^{-1}$  and  $0.222 \text{ hr}^{-1}$  for  $108 \mu\text{M}$  and  $12 \mu\text{M}$   $\text{O}_2$ ,  
435 respectively. All plots were made in Python using Matplotlib.

436 ***Ammonia excretion***- The ammonia excreting model was determined using the glucose model based on  
437 constraints of Wu et al. (20) and ATPM rates determined above. The model was first tested for average  
438 growth under experimental conditions with an excretion rate of  $3 \text{ mmol}_{\text{Ammonia}} \cdot \text{hr}^{-1} \cdot \text{g CDW}^{-1}$   
439 determined in Plunkett et al. (36).

440 ***Alternative nitrogenases***- The alternative nitrogenase enzymes of V-nitrogenase and Fe-only  
441 nitrogenase were tested for growth and flux sampling under standard sucrose conditions of  $9 \text{ mmol}$  of  
442 sucrose  $\text{hr}^{-1} \text{ gCDW}^{-1}$  and an ATPM of  $110 \text{ mmol}$  of ATP  $\text{hr}^{-1} \text{ gCDW}^{-1}$ . While these conditions are not  
443 experimentally determined for alternative growth, they are a close approximation for batch growth  
444 cultures under high  $\text{O}_2$  and carbon but metal limited conditions. To determine growth rates, FBA was  
445 used, and flux sampling was conducted as stated above.

446 ***Data Availability***- Metabolic model *iAA1300* is attached in sbml format. All other data is available at  
447 [https://github.com/alexander-alleman/Azotobactervinelandii\\_metabolicmodel](https://github.com/alexander-alleman/Azotobactervinelandii_metabolicmodel). Metabolic models are  
448 saved in json and sbml format. All analysis and figure creation were documented in Jupyter notebooks.  
449

450 Figures

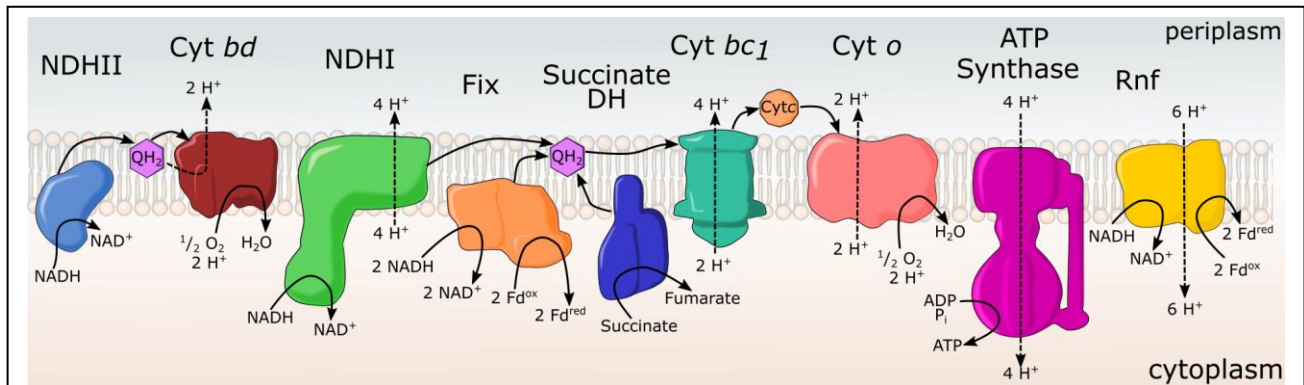

**Figure 1.** The ETS of *A. vinelandii* can be split into two paths. The first (left) is a respiratory protection pathway consisting of an uncoupled type II NADH dehydrogenase (NDHII) and terminal oxidase cytochrome *bd* (Cyt *bd*). The other path is a traditional proteobacterial electron transport chain with full proton coupled complexes: NADH dehydrogenase (NDHI), succinate dehydrogenase (Succinate DH), cytochromes *bc1/o* (Cyt *bc1/o*). The production of reduced ferredoxin (Fd) for nitrogenase is also part of the ETS with Fix and Rnf complexes. These enzymes work in parallel to balance energy production and oxygen protection.

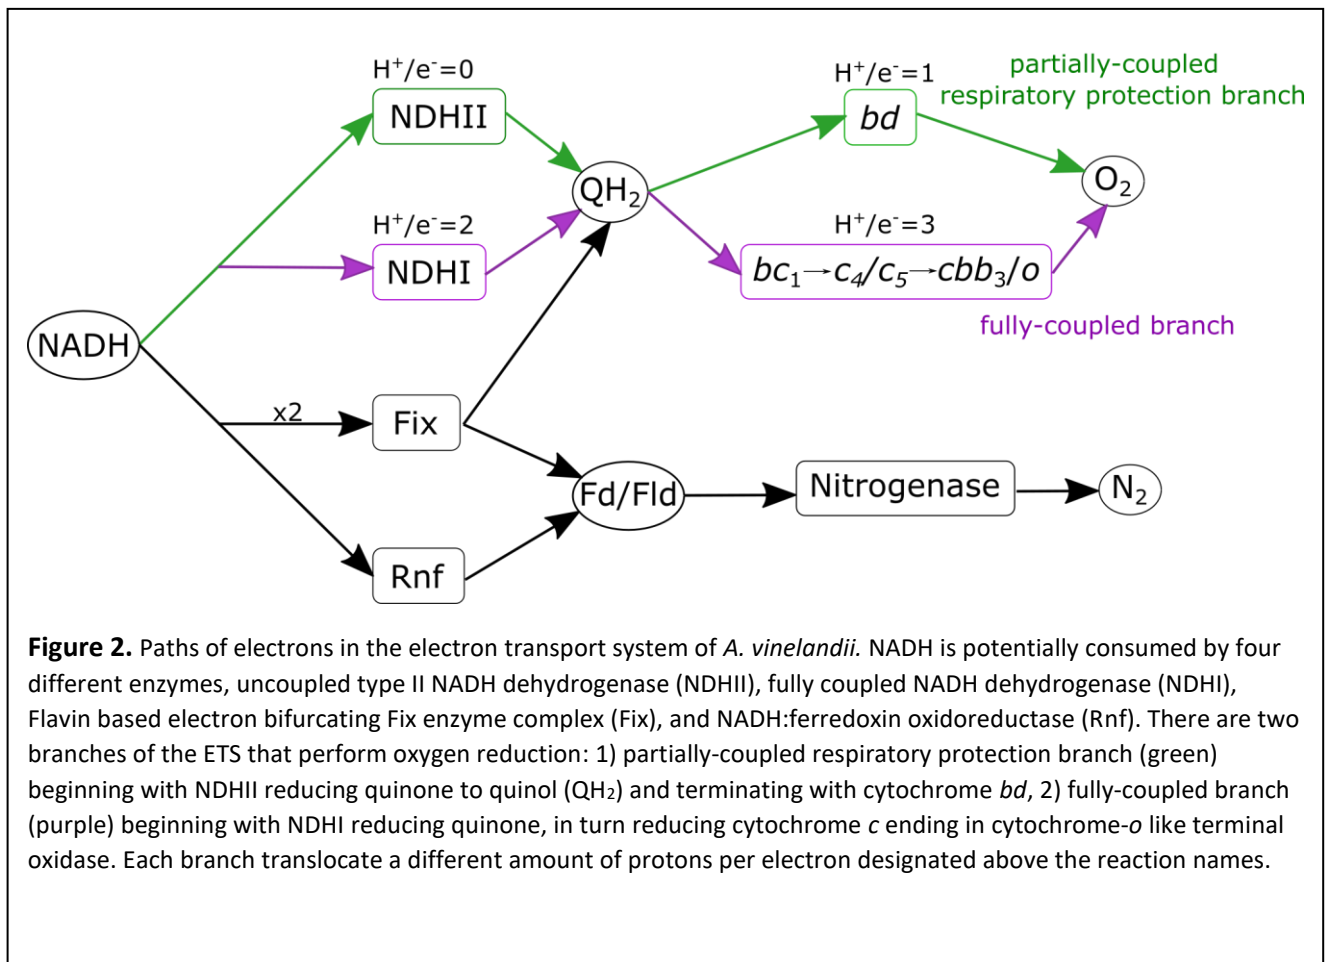

**Figure 2.** Paths of electrons in the electron transport system of *A. vinelandii*. NADH is potentially consumed by four different enzymes, uncoupled type II NADH dehydrogenase (NDHII), fully coupled NADH dehydrogenase (NDHI), Flavin based electron bifurcating Fix enzyme complex (Fix), and NADH:ferredoxin oxidoreductase (Rnf). There are two branches of the ETS that perform oxygen reduction: 1) partially-coupled respiratory protection branch (green) beginning with NDHII reducing quinone to quinol (QH<sub>2</sub>) and terminating with cytochrome *bd*, 2) fully-coupled branch (purple) beginning with NDHI reducing quinone, in turn reducing cytochrome *c* ending in cytochrome-*o* like terminal oxidase. Each branch translocate a different amount of protons per electron designated above the reaction names.

452

| Model                               | Growth rate          |              |
|-------------------------------------|----------------------|--------------|
|                                     | Ammonia supplemented | Diazotrophic |
| Experimental                        | 0.27                 | 0.22         |
| <i>iDT1278</i>                      | 1.87                 | 1.28         |
| <i>iAA1300</i>                      | 1.43                 | 0.98         |
| ED and GS Constrained               | 1.37                 | 0.93         |
| ED, GS, and Maintenance Constrained | 0.38                 | 0.24         |

Table 1) Growth rates and physiological parameters predicted from FBA results. All models have a glucose uptake rate of 15 mmol<sub>glucose</sub>/hr/gCDW. Entner-Doudoroff (ED), glyoxylate shunt (GS).

| Carbon Source | [O <sub>2</sub> ]    | Predicted ATPM                       |                                |                                |
|---------------|----------------------|--------------------------------------|--------------------------------|--------------------------------|
|               |                      | Maintenance coefficient*             | Fully-Coupled                  | Respiratory protection         |
|               | (uM O <sub>2</sub> ) | (mmol <sub>substrate</sub> /hr/gCDW) | (mmol <sub>ATP</sub> /hr/gCDW) | (mmol <sub>ATP</sub> /hr/gCDW) |
| Sucrose       | 12                   | 0.9                                  | 50.3                           | 16.3                           |
|               | 48                   | 4.4                                  | 245.6                          | 78.8                           |
|               | 108                  | 6.2                                  | 346.1                          | 110.8                          |
|               | 144                  | 7.0                                  | 390.9                          | 125.0                          |
|               | 192                  | 8.0                                  | 446.7                          | 143.1                          |
| Glucose       | 108                  | 14.8                                 | 364.4                          | 111.4                          |

Table 2) Experimental measured maintenance and predicted Non-growth associated maintenance (NGAM) for both branches of the ETC.  
\*Maintenance coefficient from Kuhlmann and Oelze (43) converted from g of protein to gCDW.

458  
459  
460  
461

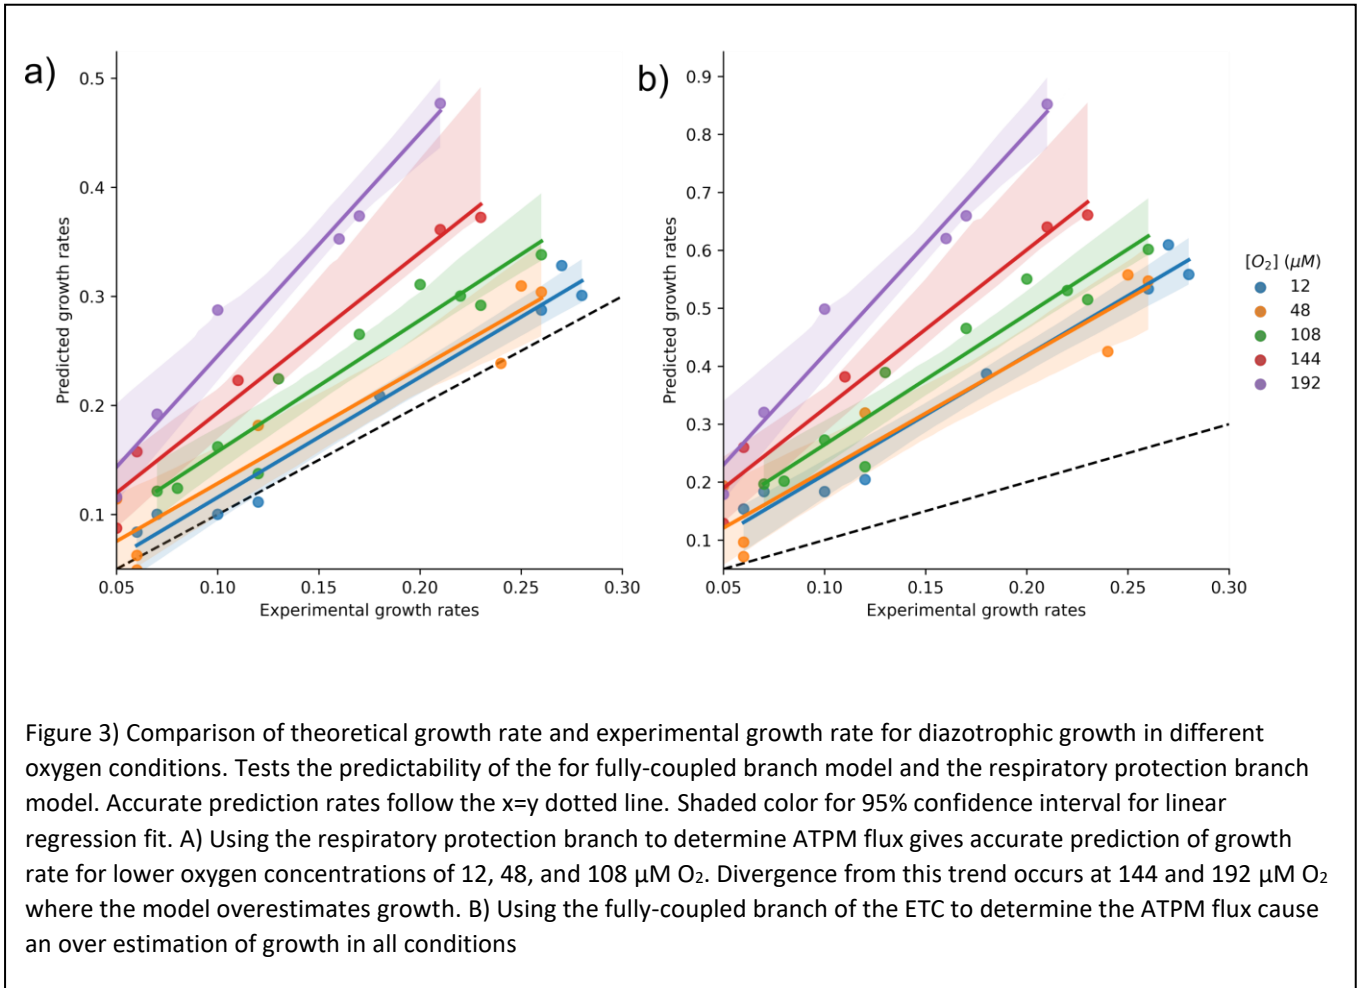

462

463

| ETS Branch             | $\mu\text{M O}_2$ | MSE  | MAE  | RMSE |
|------------------------|-------------------|------|------|------|
| Respiratory Protection | 12                | 0.00 | 0.02 | 0.03 |
|                        | 48                | 0.00 | 0.03 | 0.04 |
|                        | 108               | 0.01 | 0.07 | 0.07 |
|                        | 144               | 0.01 | 0.11 | 0.12 |
|                        | 192               | 0.03 | 0.17 | 0.18 |
| Fully coupled          | 12                | 0.05 | 0.19 | 0.22 |
|                        | 48                | 0.04 | 0.17 | 0.21 |
|                        | 108               | 0.07 | 0.25 | 0.26 |
|                        | 144               | 0.11 | 0.29 | 0.32 |
|                        | 192               | 0.20 | 0.41 | 0.44 |

Table S2) The error of predicted growth rates compared to experimentally growth rates for both ETS branches under different oxygen concentrations. Mean square error (MSE), Mean absolute error (MAE), root mean squared error (RMSE).



464

465

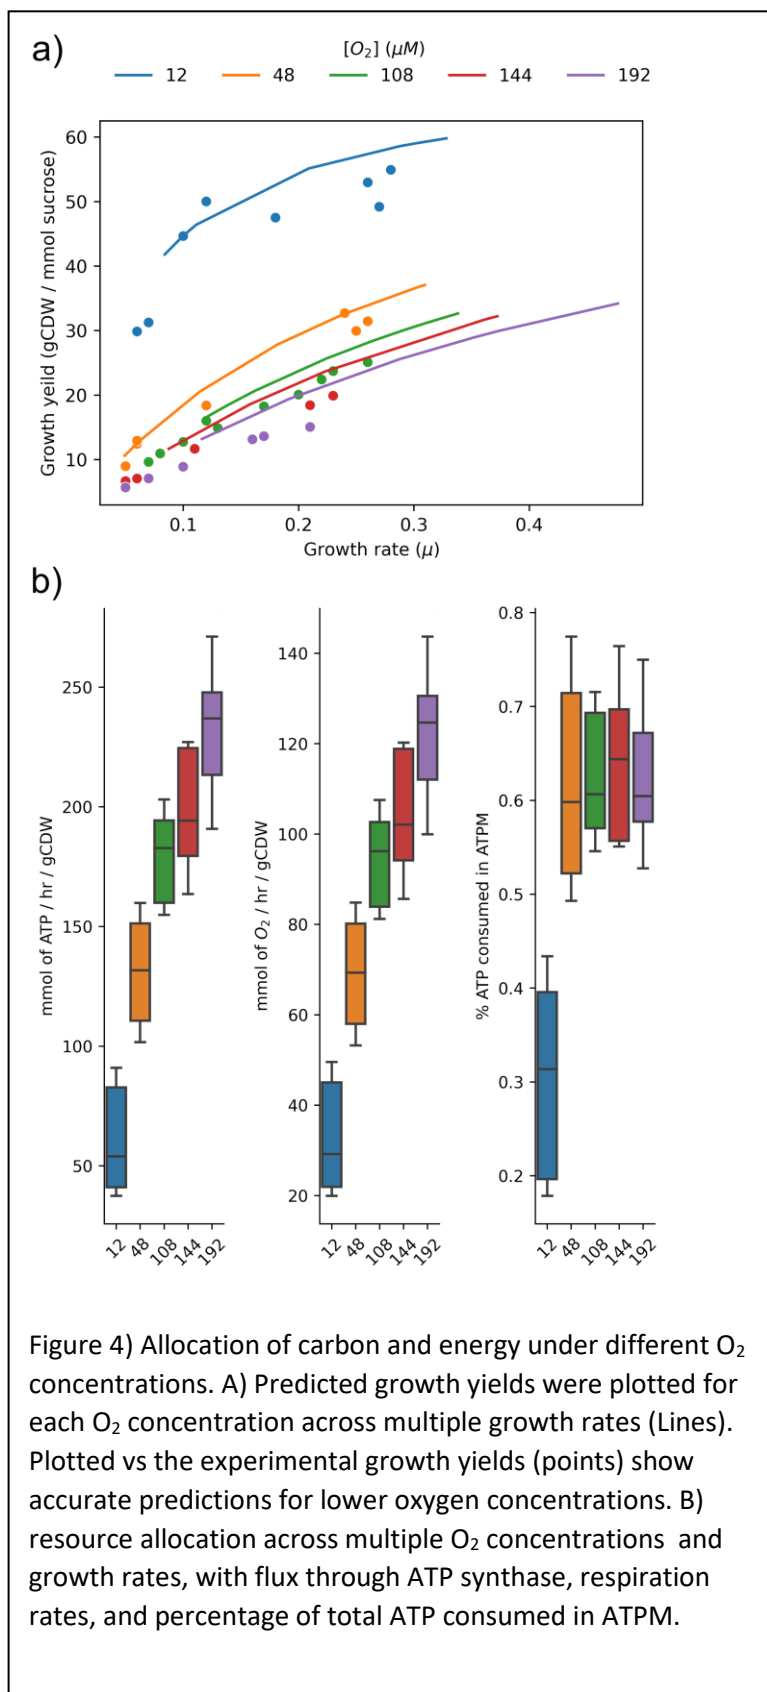

466

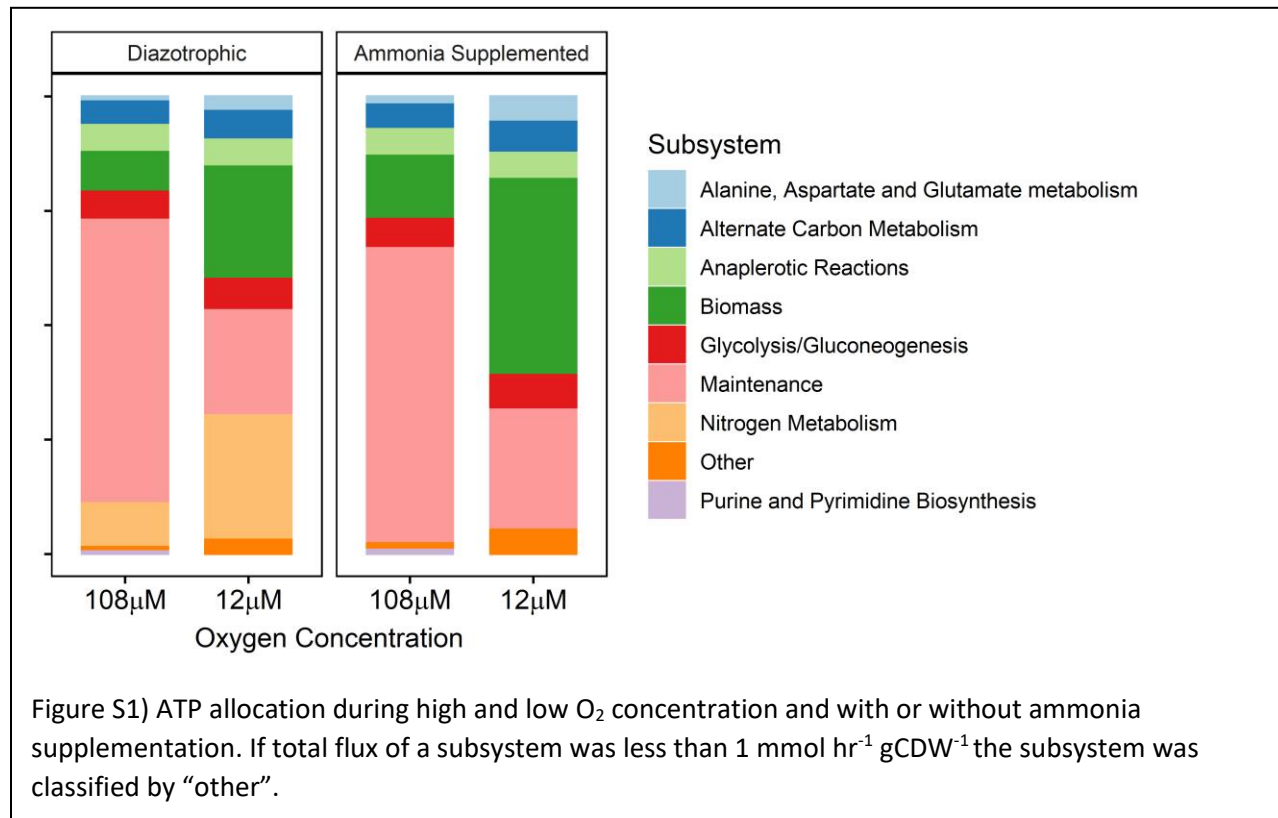

467

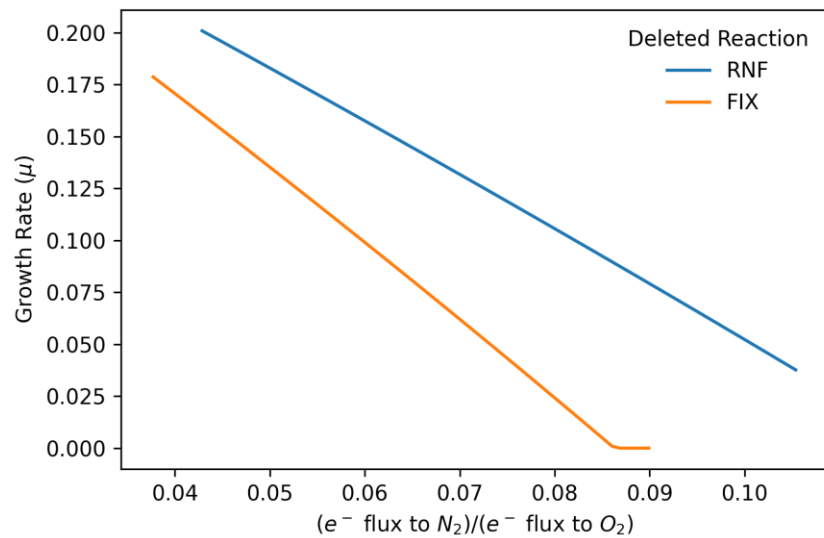

Figure S2) Growth rate vs flux to nitrogen reduction over flux to oxygen reduction. Models with either Rnf or Fix enzymes gene deletions were tested over a range of ratios of nitrogenase flux over terminal oxidase flux. As flux to nitrogenase is increased models without Fix is more susceptible and grows slower. Models without RNF can sustain a higher growth rate as flux to nitrogenase is increased.

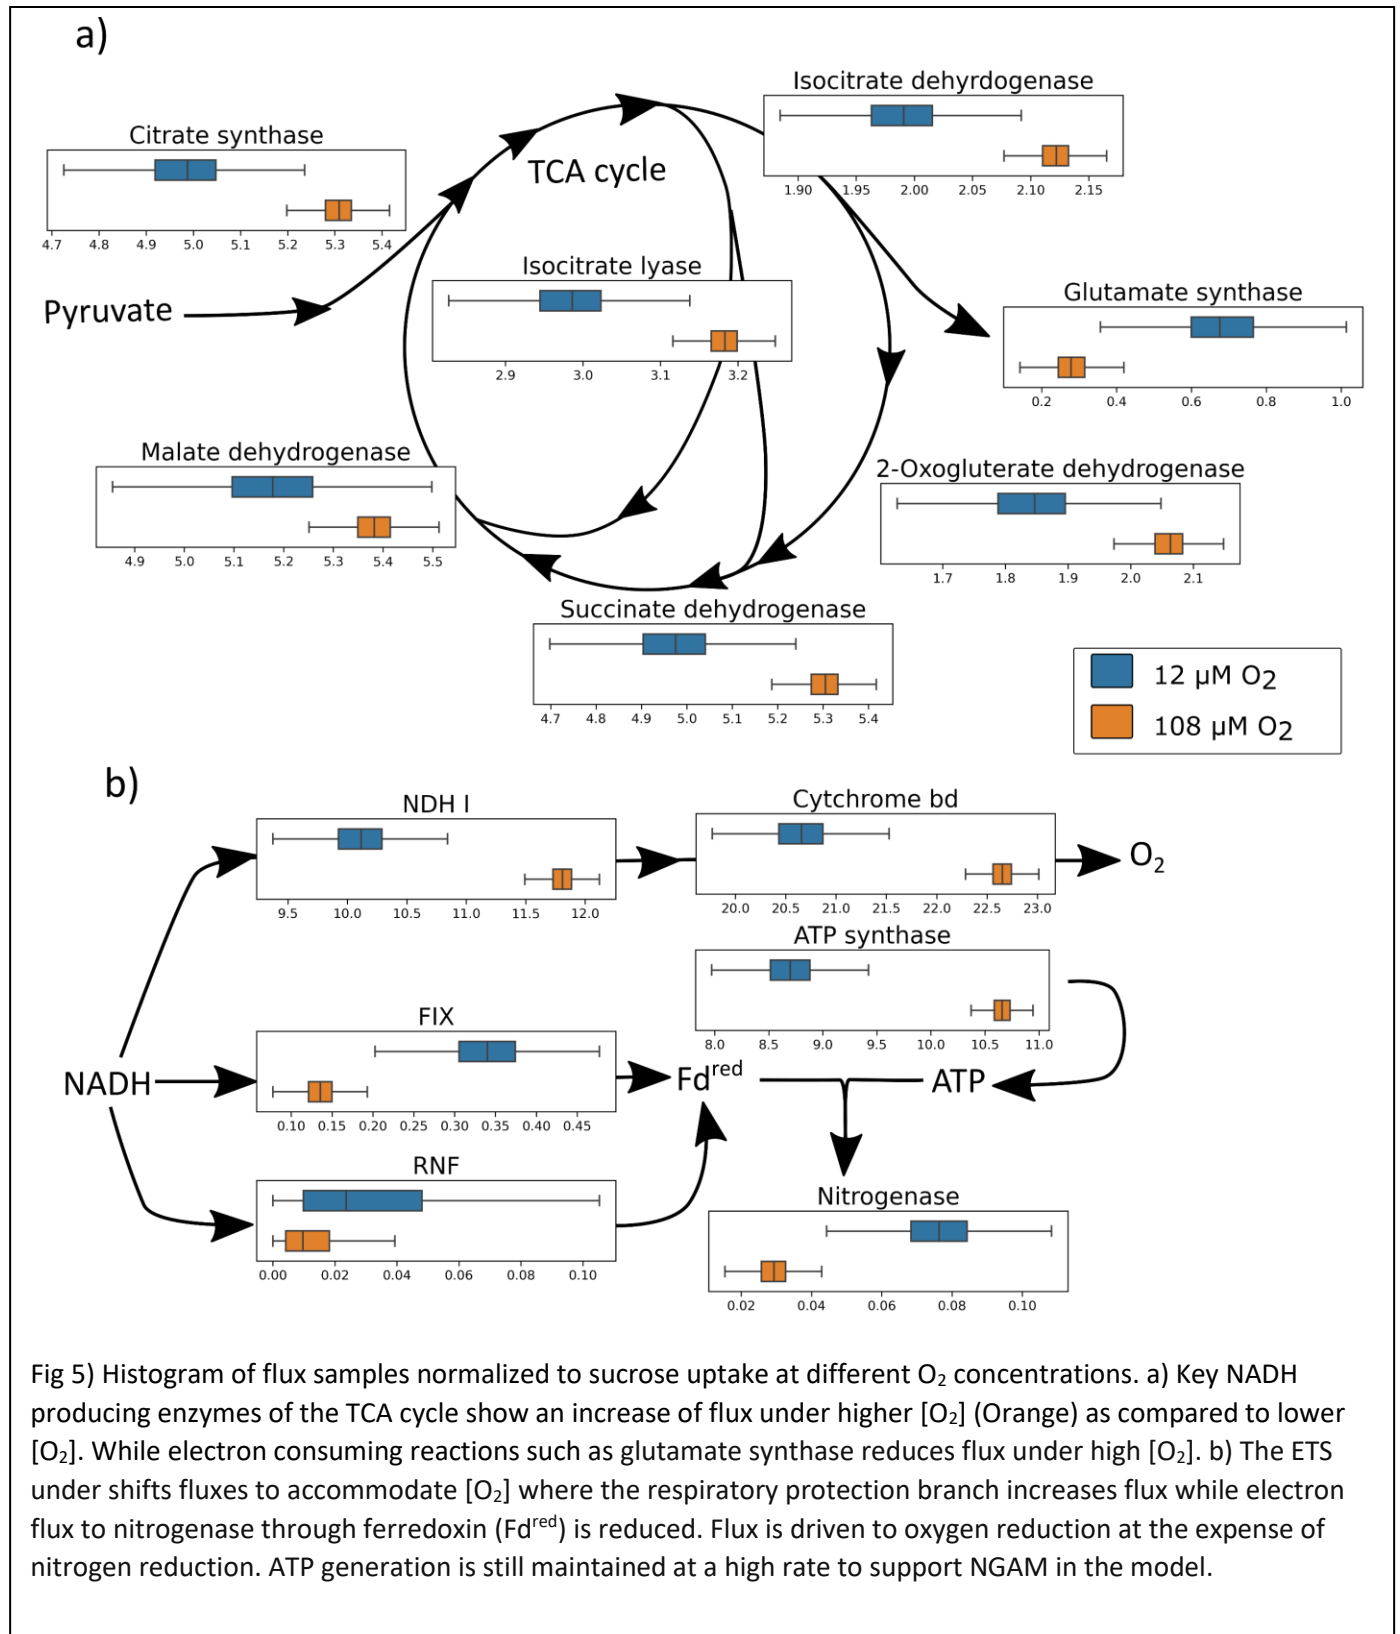

469

|                            | Mo    | V     | Fe     |
|----------------------------|-------|-------|--------|
| Growth rate                | 0.22  | 0.17  | 0.13   |
| O <sub>2</sub> consumption | 98.16 | 99.40 | 101.14 |
| Nitorgenase flux           | 1.04  | 0.91  | 0.72   |

Table 3) Growth rate and nitrogenase rates decrease as respiration increase as the model switches from Mo to V to Fe-only nitrogenase. All data from model with a sucrose uptake rate of 9 mmol<sub>sucrose</sub>/hr/gCDW and a ATP maintenance rate 110 mmol<sub>ATP</sub>/hr/gCDW. Units, growth rate (hr<sup>-1</sup>), O<sub>2</sub> consumption (mmol<sub>O<sub>2</sub></sub>/hr/gCDW), Nitrogenase flux (mmol<sub>N<sub>2</sub></sub>/hr/gCDW).

470

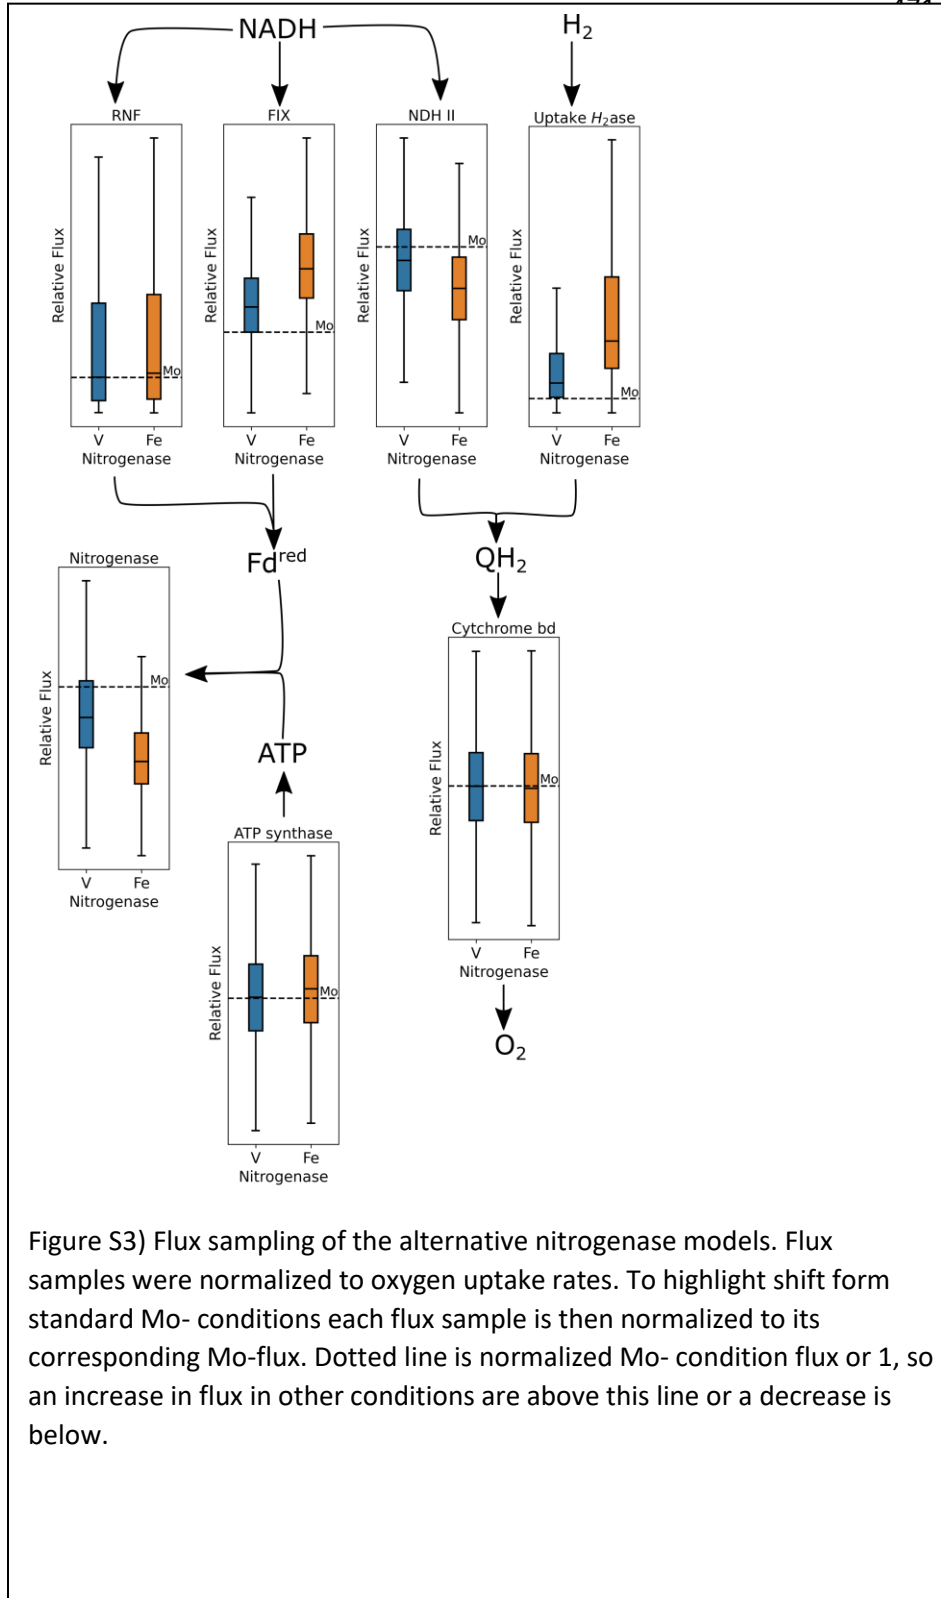

472

| Conditions                       | Growth rate | Ammonia exchange | Respiration rate | Sucrose uptake | Nitrogenase Flux |
|----------------------------------|-------------|------------------|------------------|----------------|------------------|
| Ammonia High O <sub>2</sub>      | 0.30        | -3.19            | 95.24            | -9.00          | 0.00             |
| Ammonia Low O <sub>2</sub>       | 0.33        | -3.48            | 34.07            | -4.00          | 0.00             |
| Diazotrophic High O <sub>2</sub> | 0.20        | 0.00             | 98.02            | -9.00          | 1.05             |
| Diazotrophic Low O <sub>2</sub>  | 0.22        | 0.00             | 37.10            | -4.00          | 1.15             |
| <i>ΔnifL</i> High O <sub>2</sub> | 0.10        | 3.00             | 100.64           | -9.00          | 2.04             |
| <i>ΔnifL</i> Low O <sub>2</sub>  | 0.12        | 3.00             | 39.71            | -4.00          | 2.14             |

Table 4) Table of predicted fluxes for ammonia-assimilating, diazotrophic, and ammonia-excreting (*ΔnifL*) in high (108 μM) and low (12 μM) oxygen conditions. Growth rate is in gCDW of biomass / hr, all other fluxes are in mmol of metabolite/ gCDW / hr. Negative exchange rates are uptakes into the cell, while positive values are excretions.

473

| Reaction name | Common name                                | Reaction Stoichiometry                                                                                                                                    | Gene-reaction-associations                                                                                                         | Annotation Terms                                                                                                                                |
|---------------|--------------------------------------------|-----------------------------------------------------------------------------------------------------------------------------------------------------------|------------------------------------------------------------------------------------------------------------------------------------|-------------------------------------------------------------------------------------------------------------------------------------------------|
| FIX           | Fix NADH Quinone ferredoxin oxidoreductase | $fdxo\_42\_c + 2.0\ nadh\_c + q8\_c \rightarrow fdxr\_42\_c + 2.0\ nad\_c + q8h2\_c$                                                                      | Avin_10520 and Avin_10530 and Avin_10540 and Avin_10550                                                                            | ec-code: [1.5.5.1],<br>kegg.reaction: R04433,<br>seed.reaction: rxn17250                                                                        |
| NADH6         | NADH: quinone oxidoreductase               | $5.0\ h\_c + nadh\_c + q8\_c \rightleftharpoons 4.0\ h\_p + nad\_c + q8h2\_c$                                                                             | Avin_28540 and Avin_28440 and Avin_28560 and Avin_28450 and Avin_28490 and Avin_28510 and Avin_28460 and Avin_28520 and Avin_28470 | ec-code: [7.1.1.2],<br>bigg.reaction: NADH6,<br>kegg.reaction: R11945,<br>metanetx.reaction: MNXR101873,<br>seed.reaction: rxn10122             |
| QCCOR         | quinone: cytochrome c oxidoreductase       | $2.0\ ficytC\_c + 2.0\ h\_c + q8h2\_c \rightleftharpoons 2.0\ focytC\_c + 4.0\ h\_p + q8\_c$                                                              | Avin_13060 and Avin_13070 and Avin_13080                                                                                           | metanetx.reaction: MNXR96964                                                                                                                    |
| VNIT          | Vanadium nitrogenase                       | $24.0\ atp\_c + 6.0\ fdxr\_42\_c + 24.0\ h2o\_c + n2\_c \rightarrow 24.0\ adp\_c + 6.0\ fdxo\_42\_c + 3.0\ h2\_c + 10\ h\_c + 2.0\ nh4\_c + 24.0\ pi\_c$  | Avin_02590 and Avin_02600 and Avin_02610 and Avin_02660                                                                            | ec-code: [1.18.6.2],<br>kegg.reaction: R12084                                                                                                   |
| FENIT         | Fe-only nitrogenase                        | $0.0\ atp\_c + 10.0\ fdxr\_42\_c + 40.0\ h2o\_c + n2\_c \rightarrow 40.0\ adp\_c + 10.0\ fdxo\_42\_c + 7.0\ h2\_c + 18\ h\_c + 2.0\ nh4\_c + 40.0\ pi\_c$ | Avin_48970 and Avin_48980 and Avin_48990 and Avin_49000                                                                            | N/A                                                                                                                                             |
| NAD_H2        | Soluble hydrogenase                        | $h\_c + nadh\_c \rightleftharpoons h2\_c + nad\_c$                                                                                                        | Avin_04380 and Avin_04390 and Avin_04400 and Avin_04410                                                                            | ec-code: [1.12.1.2, 1.12.1.5],<br>bigg.reaction: NAD_H2,<br>kegg.reaction: R00700,<br>metanetx.reaction: MNXR101899,<br>seed.reaction: rxn05887 |
| NADTRHD       | NAD transhydrogenase                       | $nad\_c + nadph\_c \rightarrow nadh\_c + nadp\_c$                                                                                                         | Avin_01840 and Avin_01850 and Avin_01860                                                                                           | ec-code: [1.6.1.1, 1.6.1.2],<br>bigg.reaction: NADTRHD,<br>kegg.reaction: R00112,<br>metanetx.reaction: MNXR101898,<br>seed.reaction: rxn00083  |

Table S1) Reactions added to the model iAA1300 given common name, reaction stoichiometry and gene reaction associations. Annotation terms for FIX are terms for electron transfer flavoproteins (ETFs) as electron bifurcating enzyme complex is not yet in databases. V-nitrogenase does have a kegg annotation but the stoichiometry is inaccurate. Fe-only nitrogenase has no annotation in any database.



475

| Model                         | iAA1300 | iDT1278 |
|-------------------------------|---------|---------|
| Number of gene                | 1300    | 1276    |
| Number of reactions           | 2289    | 2469    |
| Number of metabolites         | 1960    | 2003    |
| Metabolic coverage            | 1.8     | 1.9     |
|                               |         |         |
| Universally blocked reactions | 752     | 906     |
| Orphan Metabolites            | 207     | 201     |
| Dead-end Metabolites          | 191     | 190     |
|                               |         |         |
| Memote criteria               |         |         |
| Total score                   | 63%     | 37%     |
| Subtotal                      |         |         |
|                               |         |         |
| Consistency                   | 86%     | 85%     |
| Annotation - Metabolites      | 71%     | 25%     |
| Annotation - Reactions        | 73%     | 25%     |
| Annotation - Genes            | 0%      | 0%      |
| Annotation – SBO Terms        | 46%     | 0%      |

Table S3) Basic model information and Memote criteria for the model presented in this paper (iAA1300) and the previous *A. vinelandii* model (iDT1278).

476

477 Acknowledgments- The authors would like to acknowledge Professor Bernd Markus Lange for valuable  
478 insight and editorial advice.

#### 479 References

- 480 1. Tittonell P, Giller KE. 2013. When yield gaps are poverty traps: The paradigm of ecological  
481 intensification in African smallholder agriculture. *Field Crops Research* 143:76–90.
- 482 2. Fowler D, Coyle M, Skiba U, Sutton MA, Cape JN, Reis S, Sheppard LJ, Jenkins A, Grizzetti B, Galloway  
483 JN, Vitousek P, Leach A, Bouwman AF, Butterbach-bahl K, Dentener F, Stevenson D, Amann M, Voss  
484 M. 2013. The global nitrogen cycle in the twenty- first century. *Philosophical Transactions of the*  
485 *Royal Society B* 368:1–13.
- 486 3. Mus F, Alleman AB, Pence N, Seefeldt LC, Peters JW. 2018. Exploring the alternatives of biological  
487 nitrogen fixation. *Metallomics* 10:523–538.
- 488 4. Bishop PE, Jarlenski DM, Hetherington DR. 1982. Expression of an Alternative Nitrogen Fixation  
489 System in *Azotobacter vinelandii*. *Journal of bacteriology* 150:1244–1251.
- 490 5. Chisnell JR, Premakumar R, Bishop PE. 1988. Purification of a second alternative nitrogenase from a  
491 *nifHDK* deletion strain of *Azotobacter vinelandii*. *Journal of bacteriology* 170:27–33.
- 492 6. Darnajoux R, Magain N, Renaudin M, Lutzoni F, Bellenger J-P, Zhang X. 2019. Molybdenum  
493 threshold for ecosystem scale alternative vanadium nitrogenase activity in boreal forests. *PNAS*  
494 116:24682–24688.
- 495 7. Harris DF, Lukoyanov DA, Shaw S, Compton P, Tokmina-Lukaszewska M, Bothner B, Kelleher N, Dean  
496 DR, Hoffman BM, Seefeldt LC. 2017. Mechanism of N<sub>2</sub> Reduction Catalyzed by Fe-Nitrogenase  
497 Involves Reductive Elimination of H<sub>2</sub>. *Biochemistry* 57:701–710.

- 498 8. Harris DF, Yang Z-Y, Dean DR, Seefeldt LC, Hoffman BM. 2018. Kinetic Understanding of N<sub>2</sub>  
499 Reduction versus H<sub>2</sub> Evolution at the E4(4H) Janus State in the Three Nitrogenases. *Biochemistry*  
500 57:5706–5714.
- 501 9. Poudel S, Colman DR, Fixen KR, Ledbetter RN, Zheng Y, Pence N, Seefeldt LC, Peters JW, Harwood  
502 CS, Boyd ES. 2018. Electron transfer to nitrogenase in different genomic and metabolic  
503 backgrounds. *Journal of Bacteriology* 200:1–19.
- 504 10. Dos Santos PC, Fang Z, Mason SW, Setubal JC, Dixon R. 2012. Distribution of nitrogen fixation and  
505 nitrogenase-like sequences amongst microbial genomes. *BMC Genomics* 13:1–12.
- 506 11. Poole RK, Hill S. 1997. Respiratory protection of nitrogenase activity in *Azotobacter vinelandii*: roles  
507 of the terminal oxidases. *FEMS microbiology reviews* 17:303–317.
- 508 12. Bothe H, Schmitz O, Yates MG, Newton WE. 2010. Nitrogen Fixation and Hydrogen Metabolism in  
509 Cyanobacteria. *Microbiol Mol Biol Rev* 74:529–551.
- 510 13. D’Mello R, Hill S, Poole RK. 1994. Determination of the oxygen affinities of terminal oxidases in  
511 *Azotobacter vinelandii* using the deoxygenation of oxyleghaemoglobin and oxymyoglobin:  
512 Cytochrome *bd* is a low-affinity oxidase. *Microbiology* 140:1395–1402.
- 513 14. Bertsova YV, Bogachev AV, Skulachev VP. 1997. Generation of protonic potential by the *bd*-type  
514 quinol oxidase of *Azotobacter vinelandii*. *FEBS Letters* 414:369–372.
- 515 15. Oelze J. 2000. Respiratory protection of nitrogenase in *Azotobacter* species: Is a widely held  
516 hypothesis unequivocally supported by experimental evidence? *FEMS Microbiology Reviews*  
517 24:321–333.

- 518 16. Sabra W, Zeng AP, Lünsdorf H, Deckwer WD. 2000. Effect of oxygen on formation and structure of  
519 *Azotobacter vinelandii* alginate and its role in protecting nitrogenase. Applied and Environmental  
520 Microbiology 66:4037–44.
- 521 17. Peña C, Peter CP, Büchs J, Galindo E. 2007. Evolution of the specific power consumption and oxygen  
522 transfer rate in alginate-producing cultures of *Azotobacter vinelandii* conducted in shake flasks.  
523 Biochemical Engineering Journal 73–80.
- 524 18. Lozano E, Galindo E, Peña CF. 2011. Oxygen transfer rate during the production of alginate by  
525 *Azotobacter vinelandii* under oxygen- limited and non oxygen-limited conditions 10:1–12.
- 526 19. Bertsova YV, Bogachev AV, Skulachev VP. 2001. Noncoupled NADH : ubiquinone oxidoreductase of  
527 *Azotobacter vinelandii* is required for diazotrophic growth at high oxygen concentrations. J Bacteriol  
528 183:6869–6874.
- 529 20. Wu C, Herold RA, Knoshaug EP, Wang B, Xiong W, Laurens LML. 2019. Fluxomic Analysis Reveals  
530 Central Carbon Metabolism Adaptation for Diazotroph *Azotobacter vinelandii* Ammonium Excretion.  
531 1. Scientific Reports 9:13209.
- 532 21. García A, Ferrer P, Albiol J, Castillo T, Segura D, Peña C. 2018. Metabolic flux analysis and the  
533 NAD(P)H/NAD(P)<sup>+</sup> ratios in chemostat cultures of *Azotobacter vinelandii*. Microb Cell Fact 17.
- 534 22. Bertsova YV, Bogachev AV, Skulachev VP. 1998. Two NADH:ubiquinone oxidoreductases of  
535 *Azotobacter vinelandii* and their role in the respiratory protection. Biochimica et Biophysica Acta  
536 (BBA) - Bioenergetics 1363:125–133.

- 537 23. Hamilton TL, Ludwig M, Dixon R, Boyd ES, Dos Santos PC, Setubal JC, Bryant DA, Dean DR, Peters JW.  
538 2011. Transcriptional profiling of nitrogen fixation in *Azotobacter vinelandii*. *Journal of Bacteriology*  
539 193:4477–4486.
- 540 24. Noar J, Loveless T, Navarro-Herrero JL, Olson JW, Bruno-Bárcena JM. 2015. Aerobic hydrogen  
541 production via nitrogenase in *Azotobacter vinelandii* CA6. *Applied and Environmental Microbiology*  
542 81:4507–4516.
- 543 25. Wu G, Cruz-Ramos H, Hill S, Green J, Sawers G, Poole RK. 2000. Regulation of cytochrome *bd*  
544 expression in the obligate aerobe *Azotobacter vinelandii* by *CydR* (Fnr). Sensitivity to oxygen,  
545 reactive oxygen species, and nitric oxide. *Journal of Biological Chemistry* 275:4679–4686.
- 546 26. Leung D, Oost J, Kelly M, Saraste M, Hill S, Poole RK. 1994. Mutagenesis of a gene encoding a  
547 cytochrome *o*-like terminal oxidase of *Azotobacter vinelandii* : A cytochrome *o* mutant is aero-  
548 tolerant during nitrogen fixation. *FEMS Microbiology Letters* 119:351–357.
- 549 27. Lanzilotta WN, Seefeldt LC. 1997. Changes in the midpoint potentials of the nitrogenase metal  
550 centers as a result of iron protein-molybdenum-iron protein complex formation. *Biochemistry*  
551 36:12976–12983.
- 552 28. Boyd ES, Garcia Costas AM, Hamilton TL, Mus F, Peters JW. 2015. Evolution of molybdenum  
553 nitrogenase during the transition from anaerobic to aerobic metabolism. *Journal of Bacteriology*  
554 197:1690–1699.
- 555 29. Ledbetter RN, Garcia Costas AM, Lubner CE, Mulder DW, Tokmina-Lukaszewska M, Artz JH,  
556 Patterson A, Magnuson TS, Jay ZJ, Duan HD, Miller J, Plunkett MH, Hoben JP, Barney BM, Carlson RP,  
557 Miller AF, Bothner B, King PW, Peters JW, Seefeldt LC. 2017. The electron bifurcating FixABCX

- 558 protein complex from *Azotobacter vinelandii*: generation of low-potential reducing equivalents for  
559 nitrogenase catalysis. *Biochemistry* 56:4177–4190.
- 560 30. Hess V, Schuchmann K, Müller V. 2013. The ferredoxin: NAD<sup>+</sup> Oxidoreductase (Rnf) from the  
561 acetogen *Acetobacterium woodii* requires Na<sup>+</sup> and is reversibly coupled to the membrane potential.  
562 *Journal of Biological Chemistry* 288:31496–31502.
- 563 31. Curatti L, Brown CS, Ludden PW, Rubio LM, Kustu S. 2005. Genes required for rapid expression of  
564 nitrogenase activity in *Azotobacter vinelandii*. *Proceedings of the National Academy of Sciences*  
565 102:6291–6296.
- 566 32. Biegel E, Schmidt S, González JM, Müller V. 2011. Biochemistry, evolution and physiological function  
567 of the Rnf complex, a novel ion-motive electron transport complex in prokaryotes. *Cellular and*  
568 *Molecular Life Sciences* 68:613–634.
- 569 33. Inomura K, Bragg J, Follows MJ. 2016. A quantitative analysis of the direct and indirect costs of  
570 nitrogen fixation: a model based on *Azotobacter vinelandii*. *The ISME Journal* 11:166–175.
- 571 34. Inomura K, Bragg J, Riemann L, Follows MJ. 2018. A quantitative model of nitrogen fixation in the  
572 presence of ammonium. *PLOS ONE* 13:e0208282.
- 573 35. Campos DT, Zuñiga C, Passi A, Del Toro J, Tibocho-Bonilla JD, Zepeda A, Betenbaugh MJ, Zengler K.  
574 2020. Modeling of nitrogen fixation and polymer production in the heterotrophic diazotroph  
575 *Azotobacter vinelandii* DJ. *Metabolic Engineering Communications* 11:e00132.
- 576 36. Plunkett MH, Knutson CM, Barney BM. 2020. Key factors affecting ammonium production by an  
577 *Azotobacter vinelandii* strain deregulated for biological nitrogen fixation. *Microbial Cell Factories*  
578 19:107.

- 579 37. Chavarría M, Nikel PI, Pérez-Pantoja D, de Lorenzo V. 2013. The Entner-Doudoroff pathway  
580 empowers *Pseudomonas putida* KT2440 with a high tolerance to oxidative stress: Perturbing the  
581 upper metabolism of *P. putida* with PFK. *Environ Microbiol* 15:1772–1785.
- 582 38. Wong TY, Yao X-T. 1994. The DeLey-Doudoroff Pathway of Galactose Metabolism in *Azotobacter*  
583 *vinelandii*. *Applied and Environmental Microbiology* 60:2065–2068.
- 584 39. Parker CA. 1954. Effect of Oxygen on the Fixation of Nitrogen by *Azotobacter*. 4408. *Nature*  
585 173:780–781.
- 586 40. Dalton H, Postgate JR. 1968. Effect of Oxygen on Growth of *Azotobacter chroococcum* in Batch and  
587 Continuous Cultures. *Microbiology*, 54:463–473.
- 588 41. Post E, Kleiner D, Oelze J. 1983. Whole Cell respiration and nitrogenase activities in *Azotobacter*  
589 *vinelandii* growing in oxygen controlled continuous culture. *Archives of Microbiology* 134:68–72.
- 590 42. Parker CA, Scutt PB. 1960. The effect of oxygen on nitrogen fixation by *Azotobacter*. *Biochimica et*  
591 *Biophysica Acta* 38:230–238.
- 592 43. Kuhla J, Oelze J. 1988. Dependency of growth yield, maintenance and K<sub>s</sub>-values on the dissolved  
593 oxygen concentration in continuous cultures of *Azotobacter vinelandii*. *Archives of Microbiology*  
594 149:509–514.
- 595 44. Pirt SJ, Hinshelwood CN. 1965. The maintenance energy of bacteria in growing cultures. *Proceedings*  
596 *of the Royal Society of London Series B Biological Sciences* 163:224–231.
- 597 45. Kelly MJ, Poole RK, Yates MG, Kennedy C. 1990. Cloning and mutagenesis of genes encoding the  
598 cytochrome *bd* terminal oxidase complex in *Azotobacter vinelandii*: mutants deficient in the  
599 cytochrome *d* complex are unable to fix nitrogen in air. *Journal of Bacteriology* 172:6010–6019.

- 600 46. Kolonay JF, Maier RJ. 1997. Formation of pH and potential gradients by the reconstituted  
601 *Azotobacter vinelandii* cytochrome *bd* respiratory protection oxidase. Journal of bacteriology  
602 179:3813–3817.
- 603 47. Herrmann HA, Dyson BC, Vass L, Johnson GN, Schwartz J-M. 2019. Flux sampling is a powerful tool  
604 to study metabolism under changing environmental conditions. 1. npj Systems Biology and  
605 Applications 5:1–8.
- 606 48. Natzke J, Noar JD, Bruno-Bárcena JM. 2018. *Azotobacter vinelandii* Nitrogenase Activity, Hydrogen  
607 Production, and Response to Oxygen Exposure. Applied and Environmental Microbiology 84:1–10.
- 608 49. Barney BM, Plunkett MH, Natarajan V, Mus F, Knutson CM, Peters JW. 2017. Transcriptional analysis  
609 of an ammonium excreting strain of *Azotobacter vinelandii* deregulated for nitrogen fixation.  
610 Applied and Environmental Microbiology 1–38.
- 611 50. Peschek GA, Villgrater K, Wastyn M. 1991. ‘Respiratory protection’ of the nitrogenase in dinitrogen-  
612 fixing cyanobacteria. Plant Soil 137:17–24.
- 613 51. Fay P. 1992. Oxygen relations of nitrogen fixation in cyanobacteria. Microbiol Rev 56:340–373.
- 614 52. Stal LJ. 2017. The effect of oxygen concentration and temperature on nitrogenase activity in the  
615 heterocystous cyanobacterium *Fischerella* sp. 1. Scientific Reports 7:5402.
- 616 53. Phillips DH, Johnson MJ. 1961. Measurement of dissolved oxygen in fermentations. Journal of  
617 Biochemical and Microbiological Technology and Engineering 3:261–275.
- 618 54. Ackrell BAC, Jones CW. 1971. The Respiratory System of *Azotobacter vinelandii*. European Journal of  
619 Biochemistry 20:22–28.



- 620 55. Nogales J, Mueller J, Gudmundsson S, Canalejo FJ, Duque E, Monk J, Feist AM, Ramos JL, Niu W,  
621 Pálsson BO. 2020. High-quality genome-scale metabolic modelling of *Pseudomonas putida* highlights  
622 its broad metabolic capabilities. *Environmental Microbiology* 22:255–269.
- 623 56. Feist AM, Zielinski DC, Orth JD, Schellenberger J, Herrgard MJ, Pálsson BØ. 2010. Model-driven  
624 evaluation of the production potential for growth-coupled products of *Escherichia coli*. *Metabolic*  
625 *Engineering* 12:173–186.
- 626 57. D’Mello R, Purchase D, Poole RK, Hill S. 1997. Expression and content of terminal oxidases in  
627 *Azotobacter vinelandii* grown with excess NH<sub>4</sub><sup>+</sup> are modulated by O<sub>2</sub> supply. *Microbiology* 143:231–  
628 237.
- 629 58. Castillo T, Heinzle E, Peifer S, Schneider K, Pena C. 2013. Oxygen supply strongly influences  
630 metabolic fluxes, the production of poly(3-hydroxybutyrate) and alginate, and the degree of  
631 acetylation of alginate in *Azotobacter vinelandii*. *Process Biochemistry* 48:995–1003.
- 632 59. Díaz-Barrera A, Urtuvia V, Padilla-Córdova C, Peña C. 2019. Poly(3-hydroxybutyrate) accumulation  
633 by *Azotobacter vinelandii* under different oxygen transfer strategies. *J Ind Microbiol Biotechnol*  
634 46:13–19.
- 635 60. Martínez-Salazar JM, Moreno S, Nájera R, Boucher JC, Espín G, Soberón-Chávez G, Deretic V. 1996.  
636 Characterization of the genes coding for the putative sigma factor AlgU and its regulators MucA,  
637 MucB, MucC, and MucD in *Azotobacter vinelandii* and evaluation of their roles in alginate  
638 biosynthesis. *Journal of bacteriology* 178:1800–1808.
- 639 61. Setubal JC, Dos Santos P, Goldman BS, Ertesvåg H, Espin G, Rubio LM, Valla S, Almeida NF,  
640 Balasubramanian D, Cromes L, Curatti L, Du Z, Godsy E, Goodner B, Hellner-Burris K, Hernandez JA,

- 641 Houmiel K, Imperial J, Kennedy C, Larson TJ, Latreille P, Ligon LS, Lu J, Mærk M, Miller NM, Norton S,  
642 O’Carroll IP, Paulsen I, Raulfs EC, Roemer R, Rosser J, Segura D, Slater S, Stricklin SL, Studholme DJ,  
643 Sun J, Viana CJ, Wallin E, Wang B, Wheeler C, Zhu H, Dean DR, Dixon R, Wood D. 2009. Genome  
644 sequence of *Azotobacter vinelandii*, an obligate aerobe specialized to support diverse anaerobic  
645 metabolic processes. *Journal of Bacteriology* 191:4534–4545.
- 646 62. Iwahashi H, Hachiya Y, Someya J. 1991. Isolation and characterization of oxygen sensitive mutants of  
647 *Azotobacter vinelandii*. *FEMS Microbiology Letters* 77:73–78.
- 648 63. Haaker H, Klugkist J. 1987. The bioenergetics of electron transport to nitrogenase. *FEMS*  
649 *Microbiology Letters* 46:57–71.
- 650 64. Hoffman BM, Lukoyanov D, Yang ZY, Dean DR, Seefeldt LC. 2014. Mechanism of nitrogen fixation by  
651 nitrogenase : the next stage. *Chemical Reviews* 114:4041–4062.
- 652 65. Varghese F, Kabasakal BV, Cotton CAR, Schumacher J, Rutherford AW, Fantuzzi A, Murray JW. 2019.  
653 A low-potential terminal oxidase associated with the iron-only nitrogenase from the nitrogen-fixing  
654 bacterium *Azotobacter vinelandii*. *Journal of Biological Chemistry* 294:9367–9376.
- 655 66. Sarkar D, Landa M, Bandyopadhyay A, Pakrasi HB, Zehr JP, Maranas CD. 2021. Elucidation of trophic  
656 interactions in an unusual single-cell nitrogen-fixing symbiosis using metabolic modeling. *PLOS*  
657 *Computational Biology* 17:e1008983.
- 658 67. Linkerhägner K, Oelze J. 1995. Hydrogenase does not confer significant benefits to *Azotobacter*  
659 *vinelandii* growing diazotrophically under conditions of glucose limitation. *Journal of Bacteriology*  
660 177:6018–6020.

- 661 68. Ambrosio R, Ortiz-Marquez JCF, Curatti L. 2017. Metabolic engineering of a diazotrophic bacterium  
662 improves ammonium release and biofertilization of plants and microalgae. *Metabolic Engineering*  
663 40:59–68.
- 664 69. Danyal K, Inglet BS, Vincent KA, Barney BM, Hoffman BM, Armstrong FA, Dean DR, Seefeldt LC.  
665 2010. Uncoupling nitrogenase: Catalytic reduction of hydrazine to ammonia by a MoFe protein in  
666 the absence of Fe protein-ATP. *Journal of the American Chemical Society* 132:13197–13199.
- 667 70. Mus F, Crook MB, Garcia K, Garcia Costas A, Geddes BA, Kouri E-DD, Paramasivan P, Ryu M-H,  
668 Oldroyd GED, Poole PS, Udvardi MK, Voigt CA, Ané J-M, Peters JW. 2016. Symbiotic nitrogen fixation  
669 and challenges to extending it to non-legumes. *Applied and environmental microbiology* 82:3698–  
670 3710.
- 671 71. Wong T-Y, Maier RJ. 1984. Hydrogen-Oxidizing Electron Transport Components in Nitrogen- Fixing  
672 *Azotobacter vinelandii*. *J BACTERIOL* 159:5.
- 673 72. Jurtshuk P, Bednarz AJ, Zey P, Denton CH. 1969. L-malate oxidation by the electron transport  
674 fraction of *Azotobacter vinelandii*. *Journal of Bacteriology* 98:1120–1127.
- 675 73. Jones CW, Redfearn E. Electron Transport in *Azotobacter vinelandii*. *Biochimica et Biophysica Acta*  
676 113:467–481.
- 677 74. Quiroz-Rocha E, Moreno R, Hernández-Ortíz A, Fragoso-Jiménez JC, Muriel-Millán LF, Guzmán J,  
678 Espín G, Rojo F, Núñez C. 2017. Glucose uptake in *Azotobacter vinelandii* occurs through a GluP  
679 transporter that is under the control of the CbrA/CbrB and Hfq-Crc systems. 1. *Scientific Reports*  
680 7:858.

- 681 75. Heirendt L, Arreckx S, Pfau T, Mendoza SN, Richelle A, Heinken A, Haraldsdóttir HS, Wachowiak J,  
682 Keating SM, Vlasov V, Magnusdóttir S, Ng CY, Preciat G, Žagare A, Chan SHJ, Aurich MK, Clancy CM,  
683 Modamio J, Sauls JT, Noronha A, Bordbar A, Cousins B, El Assal DC, Valcarcel LV, Apaolaza I, Ghaderi  
684 S, Ahookhosh M, Ben Guebila M, Kostromins A, Sompairac N, Le HM, Ma D, Sun Y, Wang L,  
685 Yurkovich JT, Oliveira MAP, Vuong PT, El Assal LP, Kuperstein I, Zinovyev A, Hinton HS, Bryant WA,  
686 Aragón Artacho FJ, Planes FJ, Stalidzans E, Maass A, Vempala S, Hucka M, Saunders MA, Maranas  
687 CD, Lewis NE, Sauter T, Palsson BØ, Thiele I, Fleming RMT. 2019. Creation and analysis of  
688 biochemical constraint-based models using the COBRA Toolbox v.3.0. 3. *Nature Protocols* 14:639–  
689 702.
- 690 76. Lieven C, Beber ME, Olivier BG, Bergmann FT, Ataman M, Babaei P, Bartell JA, Blank LM, Chauhan S,  
691 Correia K, Diener C, Dräger A, Ebert BE, Edirisinghe JN, Faria JP, Feist AM, Fengos G, Fleming RMT,  
692 García-Jiménez B, Hatzimanikatis V, van Helvoirt W, Henry CS, Hermjakob H, Herrgård MJ, Kaafarani  
693 A, Kim HU, King Z, Klamt S, Klipp E, Koehorst JJ, König M, Lakshmanan M, Lee D-Y, Lee SY, Lee S,  
694 Lewis NE, Liu F, Ma H, Machado D, Mahadevan R, Maia P, Mardinoglu A, Medlock GL, Monk JM,  
695 Nielsen J, Nielsen LK, Nogales J, Nookaew I, Palsson BO, Papin JA, Patil KR, Poolman M, Price ND,  
696 Resendis-Antonio O, Richelle A, Rocha I, Sánchez BJ, Schaap PJ, Malik Sheriff RS, Shoaie S,  
697 Sonnenschein N, Teusink B, Vilaça P, Vik JO, Wodke JAH, Xavier JC, Yuan Q, Zakhartsev M, Zhang C.  
698 2020. MEMOTE for standardized genome-scale metabolic model testing. 3. *Nat Biotechnol* 38:272–  
699 276.
- 700 77. Ebrahim A, Lerman JA, Palsson BO, Hyduke DR. 2013. COBRApy: CONstraints-Based Reconstruction  
701 and Analysis for Python. *BMC Systems Biology* 7:74.
- 702 78. Rohatgi A. WebPlotDigitizer User Manual Version 4.3 23.

703 79. Virtanen P, Gommers R, Oliphant TE, Haberland M, Reddy T, Cournapeau D, Burovski E, Peterson P,  
704 Weckesser W, Bright J, van der Walt SJ, Brett M, Wilson J, Millman KJ, Mayorov N, Nelson ARJ, Jones  
705 E, Kern R, Larson E, Carey CJ, Polat İ, Feng Y, Moore EW, VanderPlas J, Laxalde D, Perktold J,  
706 Cimrman R, Henriksen I, Quintero EA, Harris CR, Archibald AM, Ribeiro AH, Pedregosa F, van  
707 Mulbregt P. 2020. SciPy 1.0: fundamental algorithms for scientific computing in Python. 3. Nature  
708 Methods 17:261–272.

709 80. Megchelenbrink W, Huynen M, Marchiori E. 2014. optGpSampler: An Improved Tool for Uniformly  
710 Sampling the Solution-Space of Genome-Scale Metabolic Networks. PLOS ONE 9:e86587.

711
